# Supplementary material for: Immunomodulatory contribution of mast cells to the regenerative biomaterial microenvironment
Source: PubMed Central journal article supplement (PMC10511634; doi:10.1038/s41536-023-00324-0), 2023-09-20
Supplement: 41536_2023_324_MOESM1_ESM.pdf [file 41536_2023_324_MOESM1_ESM.pdf]

## Supplementary Information

### Supplementary Figures

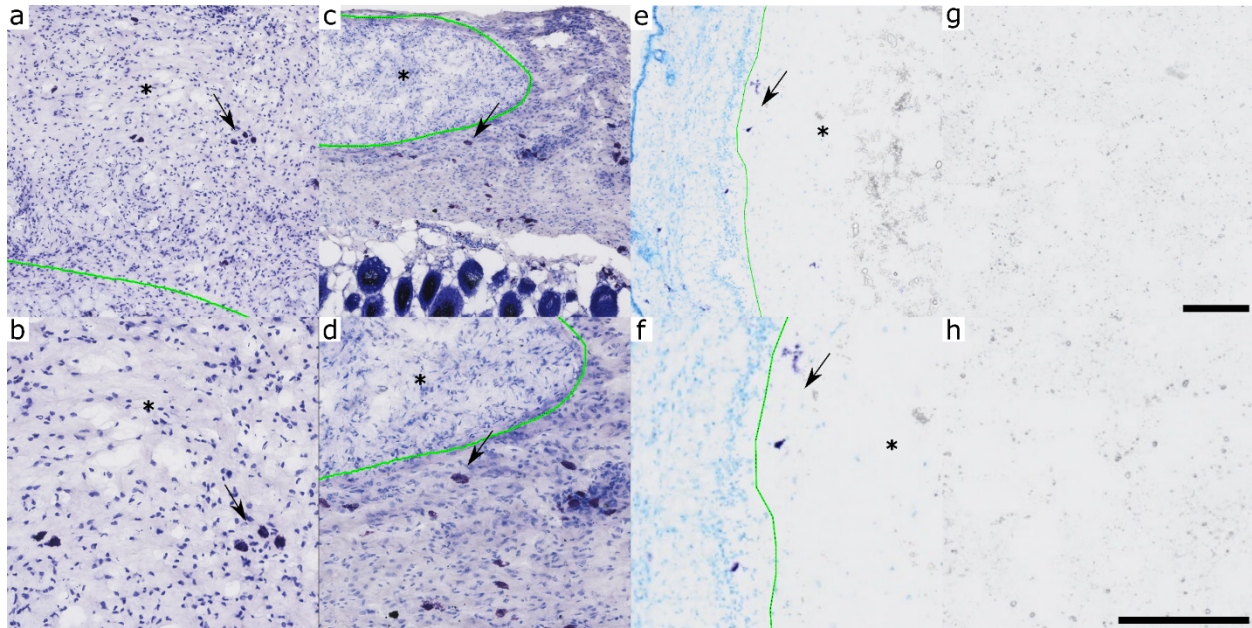

**Supplementary Figure 1: Toluidine blue staining of subcutaneously injected ECM hydrogel, urinary bladder matrix powder, and synthetic PEG-trilysine hydrogel.** Representative and zoomed toluidine blue staining images of a subcutaneously injected (a, b) ECM hydrogel scaffold, (c, d) milled urinary bladder matrix, and (e, f) border and (g, h) interior of a PEG-trilysine hydrogel (material outlined in green with asterisk on side where material is present) and neighboring dermal tissue in male wild-type mice 3 days post-injection. Region with mast cells staining is indicated by a black arrow. Scale bar is 200  $\mu\text{m}$ .

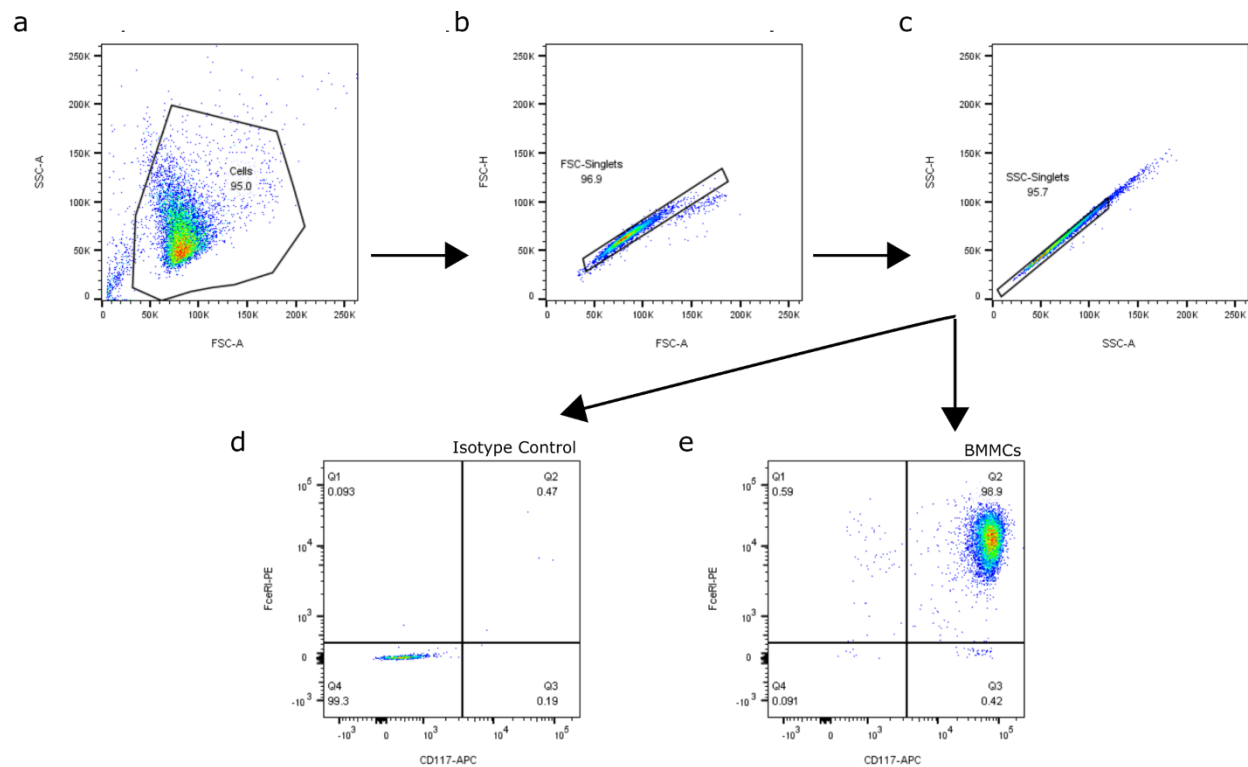

**Supplementary Figure 2: Gating scheme for bone marrow derived differentiated mast cell culture purity.** Representative gating of mast cells for assessing purity at four to six weeks of differentiation protocol. **(a)** Cells and **(b-c)** double discrimination of singlets based on forward and side scatter. Quadrant gating cut-offs were set relative to **(d)** isotype control for **(e)** CD117<sup>+</sup>FcεRI<sup>+</sup> mast cells.

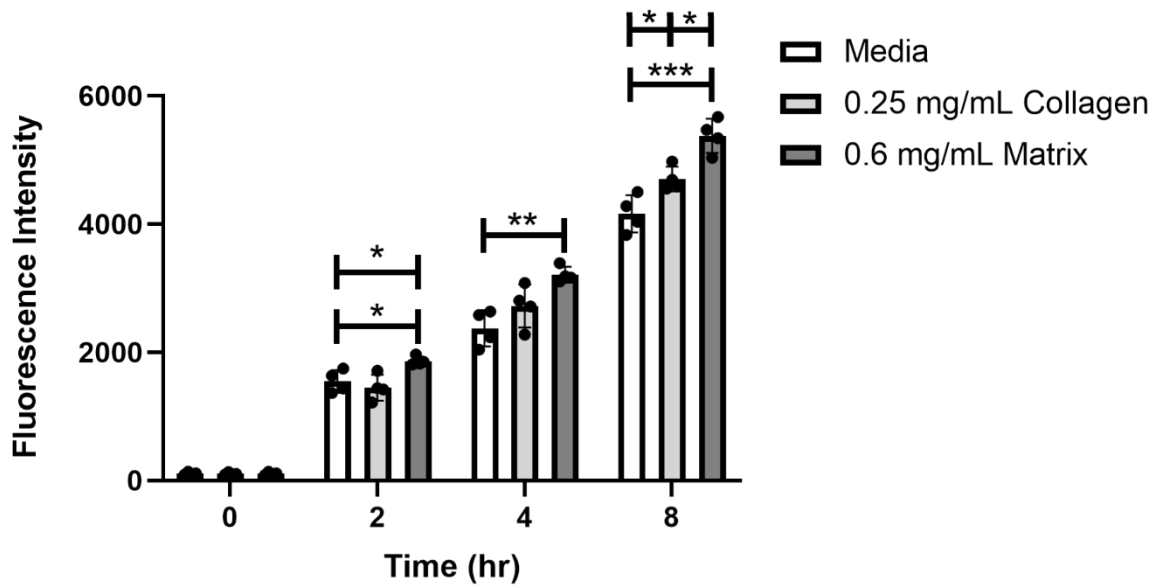

**Supplementary Figure 3: Viability assay of mast cells incubated with ECM hydrogel.** Four week differentiated bone marrow derived mast cells were incubated with ECM hydrogel material, collagen or culture media control. Collagen concentration was chosen based on previous studies showing analogous material properties to ECM hydrogels at this relative concentration<sup>1</sup>. AlamarBlue™ fluorescent readings were taken at 0, 2, 4, and 8 hours following plate set-up. n = 4 per group. Data displayed as mean ±SD. (\* $p < 0.05$ , \*\* $p < 0.01$ , \*\*\* $p < 0.001$ ).

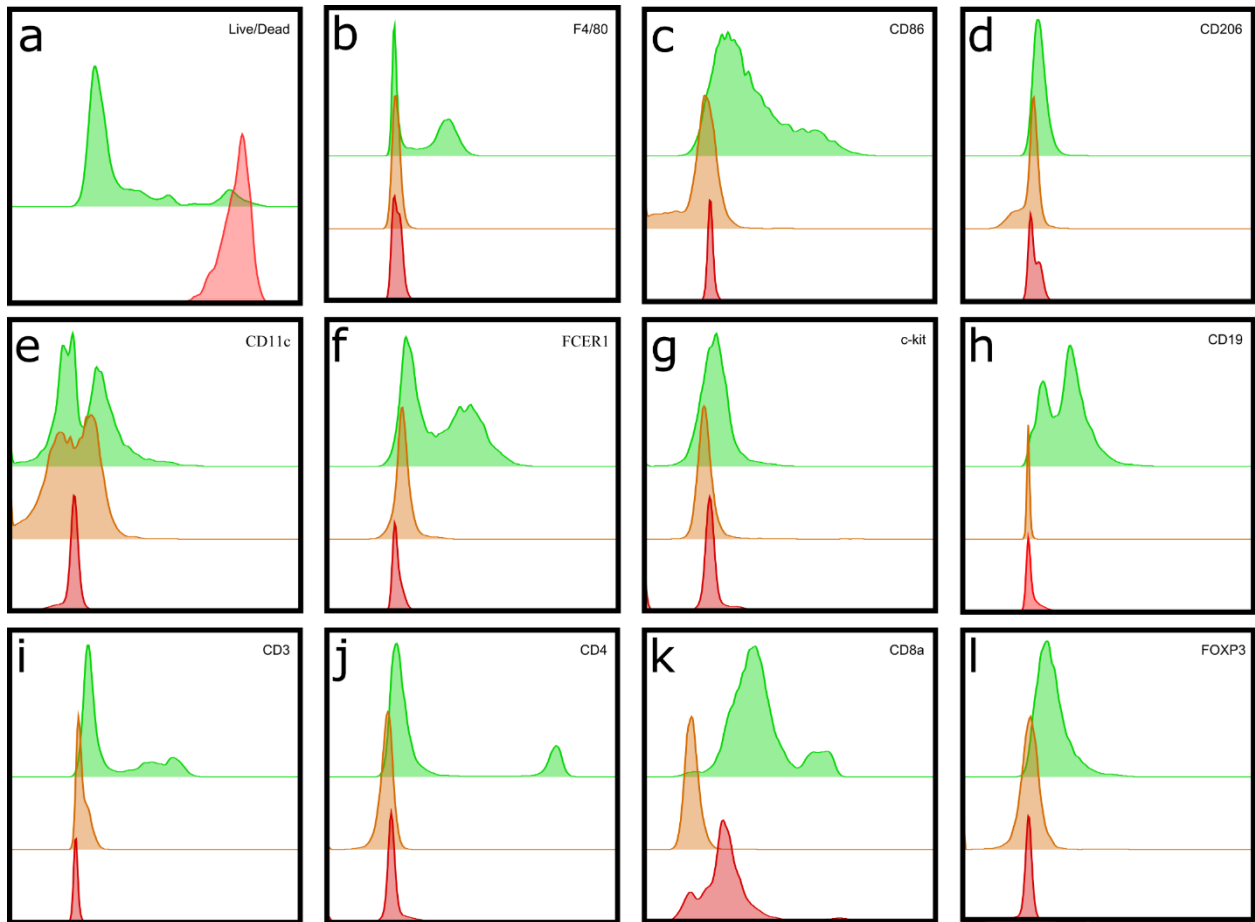

**Supplementary Figure 4: Gating controls for flow cytometry markers.** (a) LIVE, DEAD<sup>TM</sup> Aqua thresholds utilized ethanol fixed sample as control (red) for determining live cell gating (green). (b-l) Gating for fluorescent antibody markers was set for positive signal (green) based on isotype (red) and fluorescence minus one controls (orange).

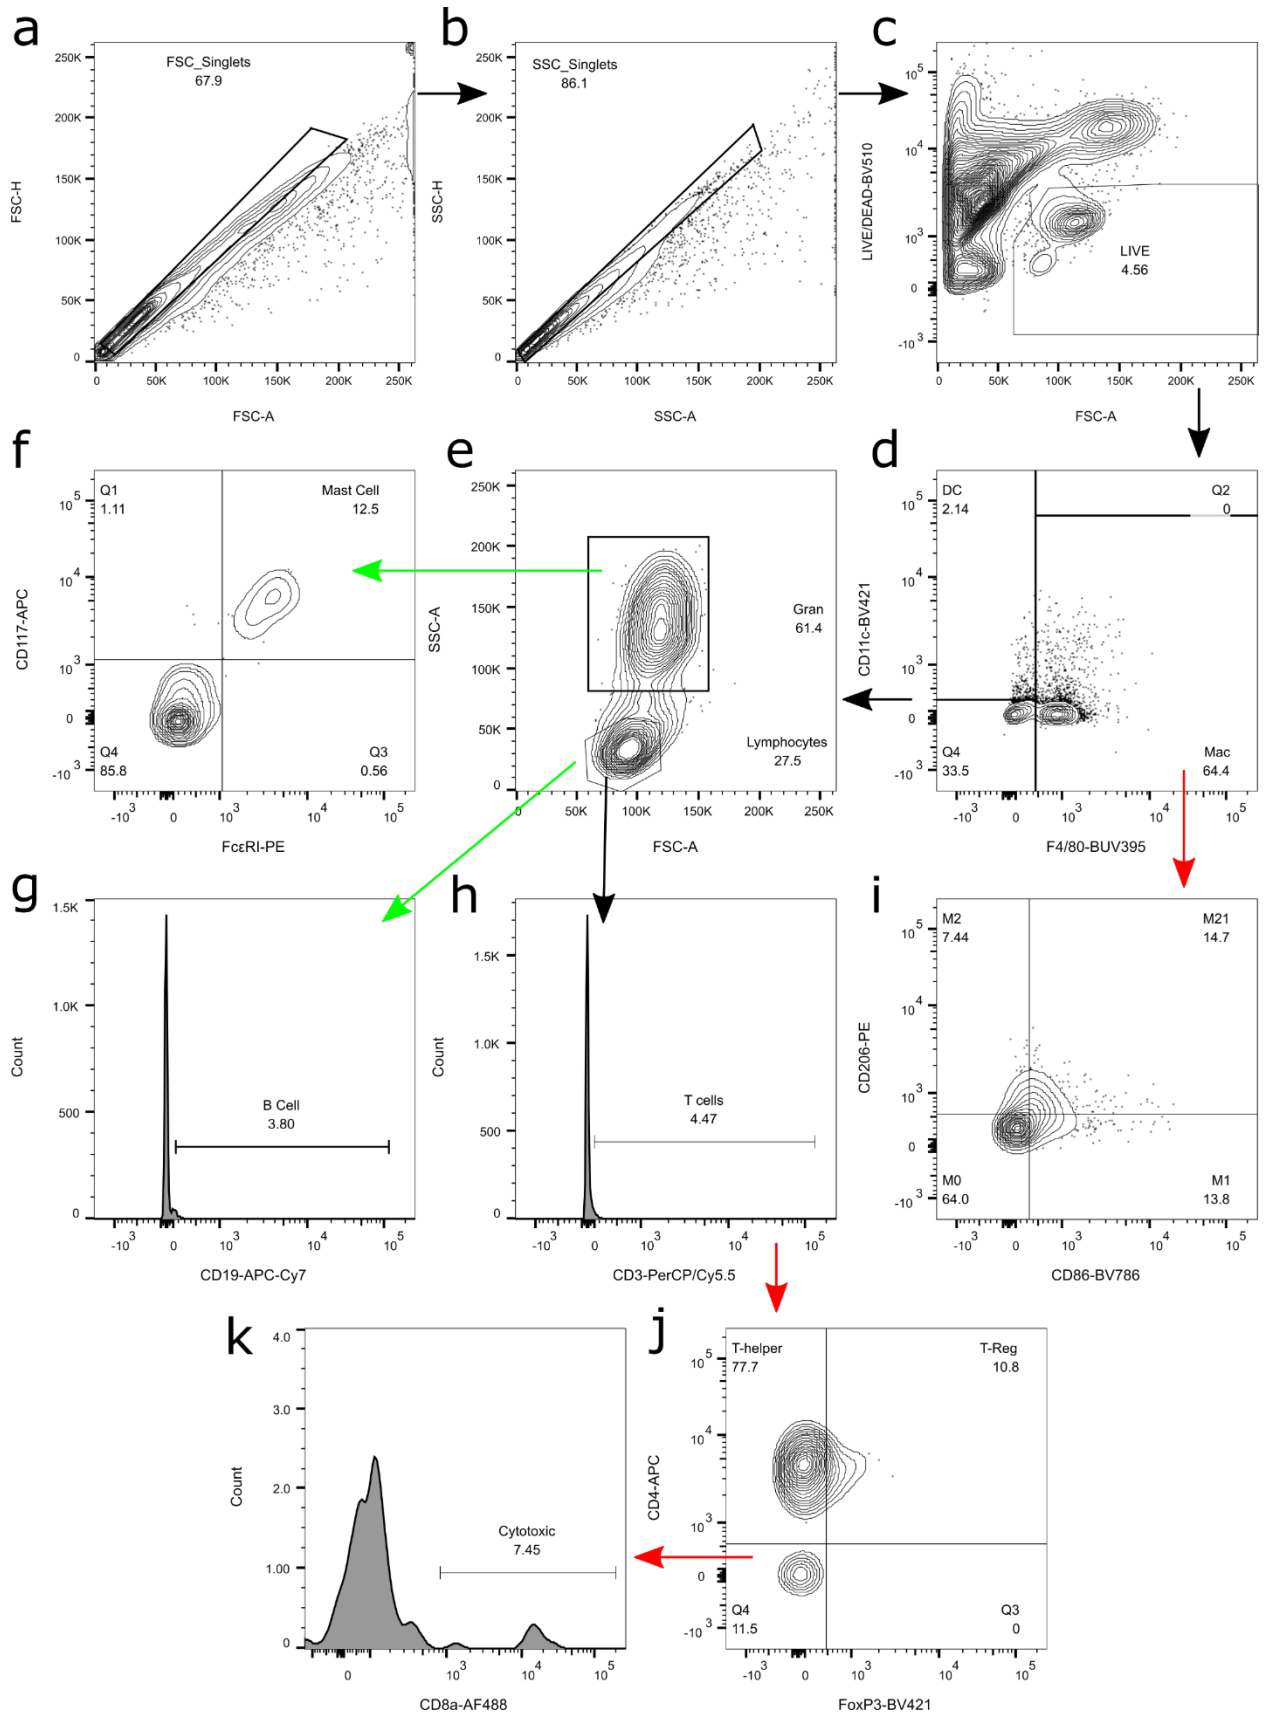

### **Supplementary Figure 5: Gating Scheme for flow cytometry analysis.**

Representative gating of single cell suspension isolated from subcutaneously injected ECM hydrogel. General gating for both panels (black arrows) started with double discrimination of singlets based on **(a)** forward and **(b)** side scatter. **(c)** Live cells were gated based lack of stain uptake and forward scatter to distinguish debris. **(d)** Macrophage and dendritic cell populations were gated based on F4/80<sup>+</sup> and CD11c<sup>+</sup>, respectively. **(e)** F4/80<sup>-</sup> populations were separated into granulocyte and lymphocytes. For a general immune cell population panel (green arrow), granulocytes were assessed as **(f)** CD117<sup>+</sup>FcεRI<sup>+</sup> mast cells and lymphocytes for **(g)** CD19<sup>+</sup> B cells and **(h)** CD3<sup>+</sup>CD19<sup>-</sup> for T cells. For immune cell polarization panel (red arrow), **(i)** F4/80<sup>+</sup> macrophage polarization was assessed for numbers of M1 CD86<sup>+</sup>CD206<sup>-</sup> and M2 CD86<sup>-</sup>CD206<sup>+</sup>. CD3<sup>+</sup> T cells were assessed as **(j)** CD4<sup>+</sup>FOXP3<sup>-</sup> T helper cells, CD4<sup>+</sup>FOXP3<sup>+</sup> regulatory T cells, and **(k)** CD4<sup>-</sup>FOXP3<sup>-</sup>CD8a<sup>+</sup> cytotoxic T cells.

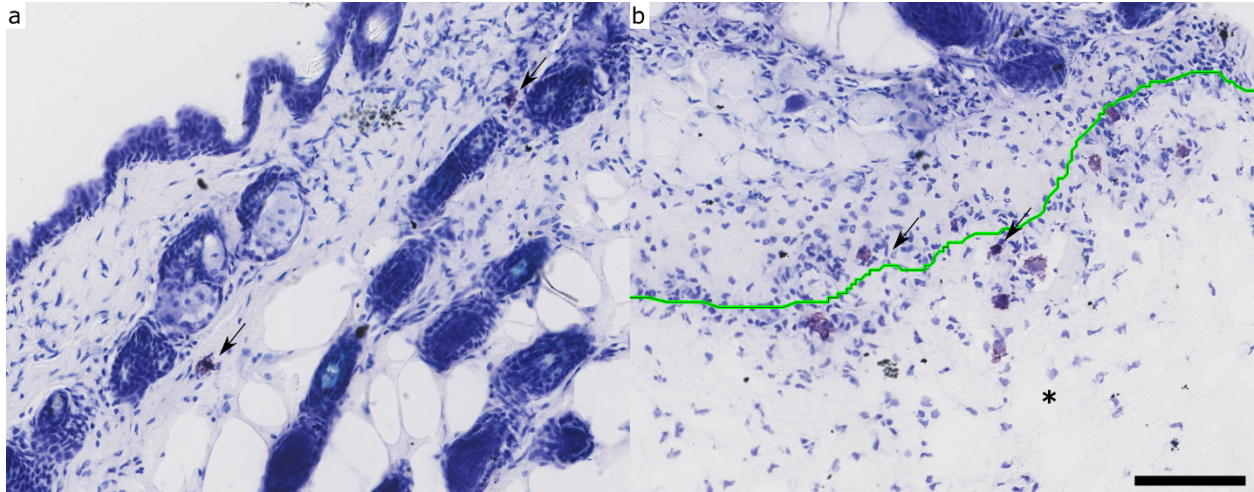

**Supplementary Figure 6: Mast cells engraftment in deficient mice.** Representative toluidine blue staining in 11-13 week old deficient mice following dorsal subcutaneous injection of *in vitro* differentiated bone marrow derived mast cells at 4-6 weeks old showing reconstitution of mast cells in the **(a)** skin and infiltrating into subcutaneously injected **(b)** ECM scaffold at 3 days post-injection (material outlined in green with asterisk on side where material is present). Mast cells staining is indicated by a black arrow with both resting and degranulated mast cells observed at this timepoint. Scale bar is 100  $\mu$ m.

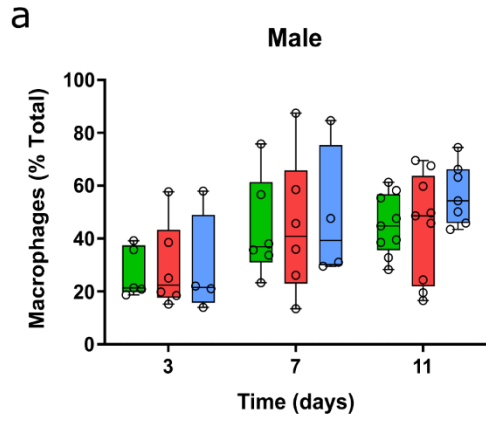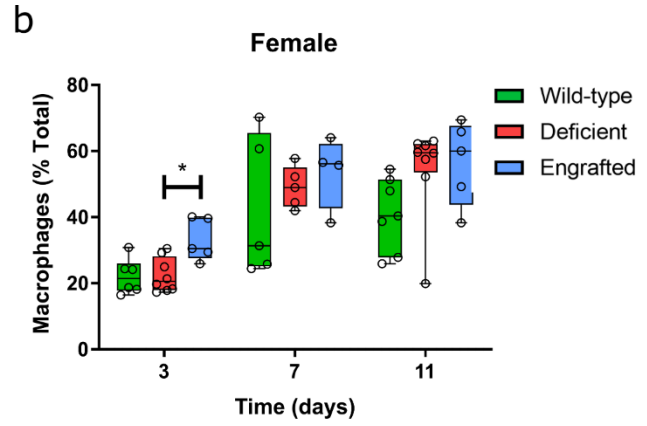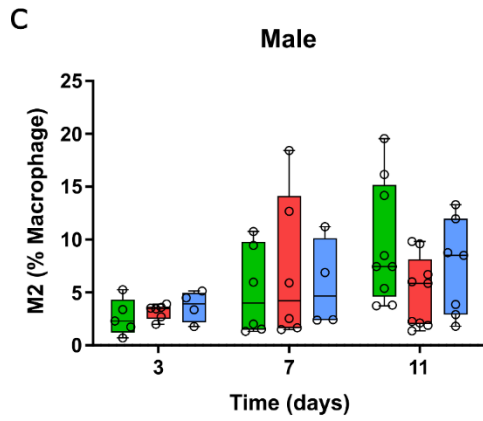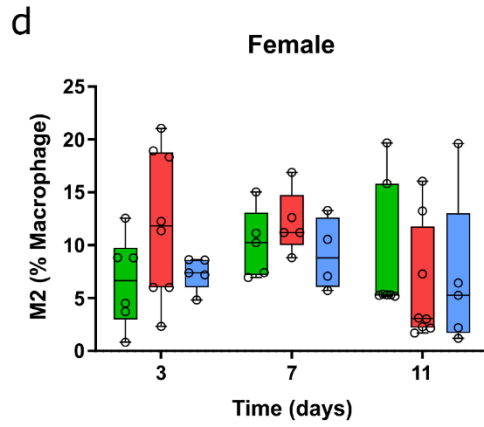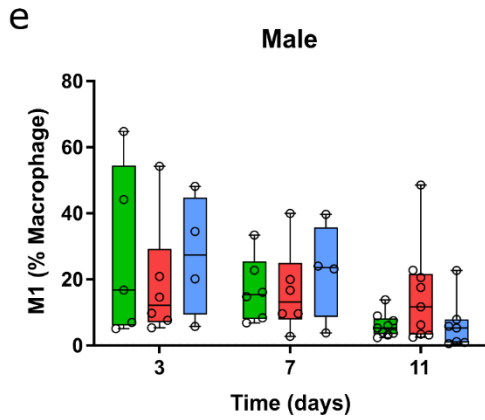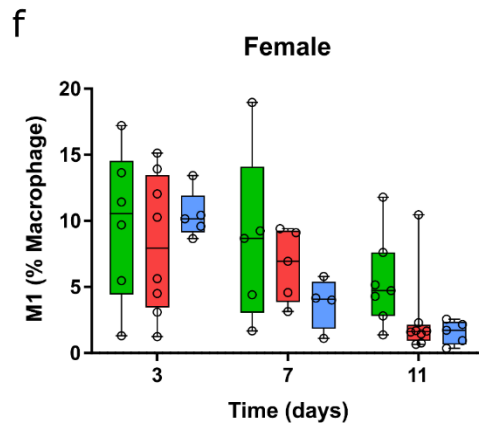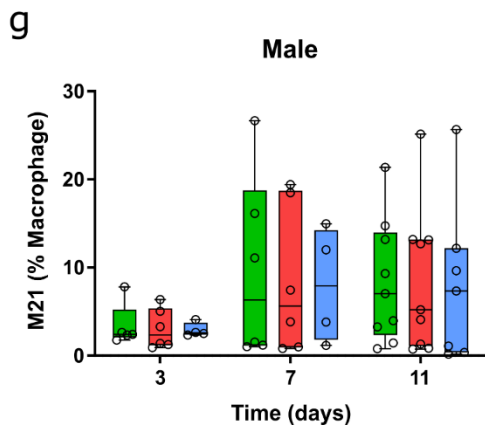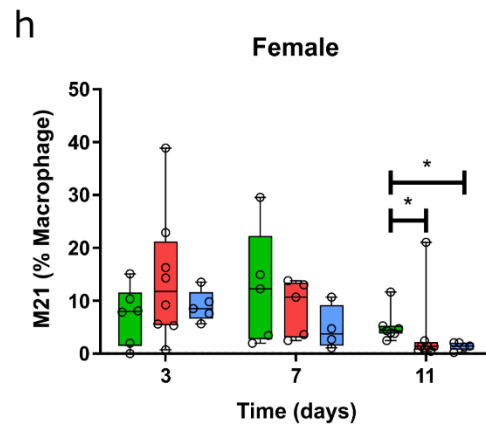



**Supplementary Figure 7: Flow cytometry of total and macrophage polarized subpopulations.** Percentages of total F4, 80<sup>+</sup> macrophages relative to live cells (**a, b**), and CD206<sup>+</sup> M2 (**c, d**), CD86<sup>+</sup> M1 (**e, f**) and co-expressing CD206<sup>+</sup>CD86<sup>+</sup> M21 (**g, h**) macrophages relative to total macrophages at three, seven, and eleven days post-injection between wild-type (green), deficient (red), and engrafted (blue) male (**a, c, e, g**) and female mice (**b, d, f, h**) with median values indicated by a black bar per group. n = 4-9 per group. Box plots display median with 25-75% percentile distribution.

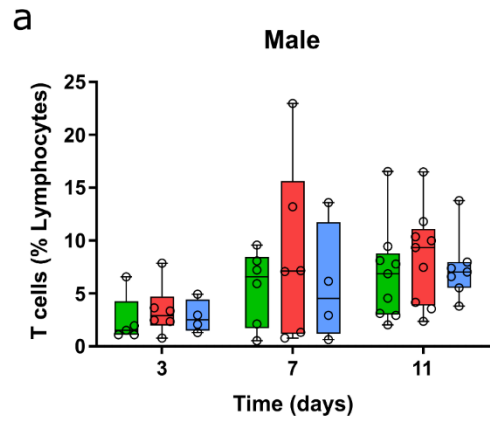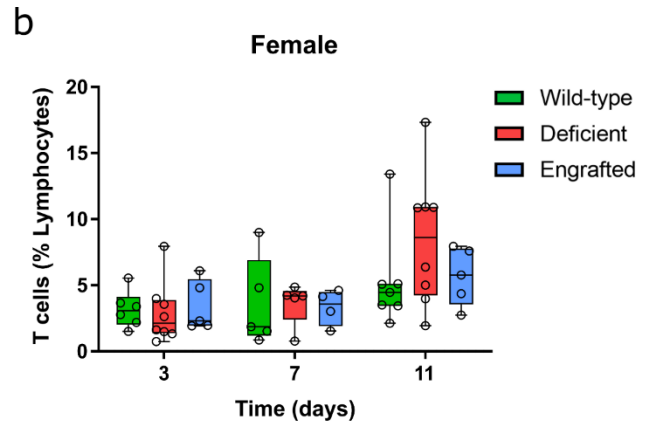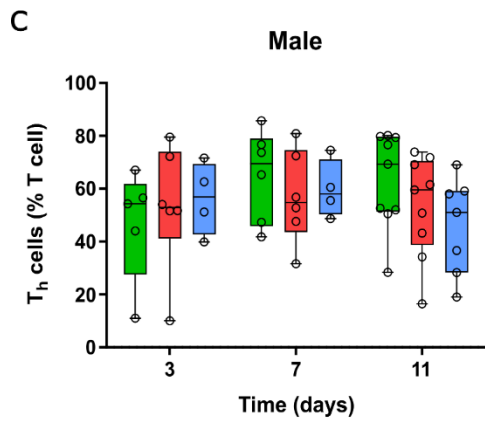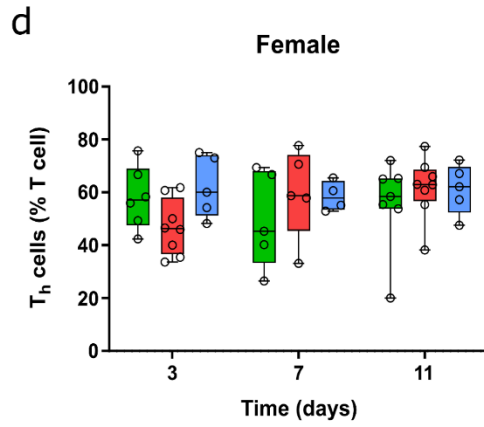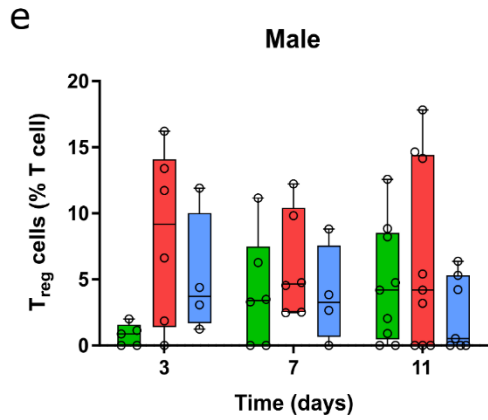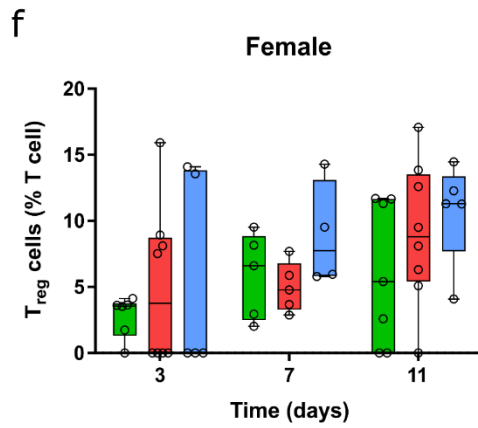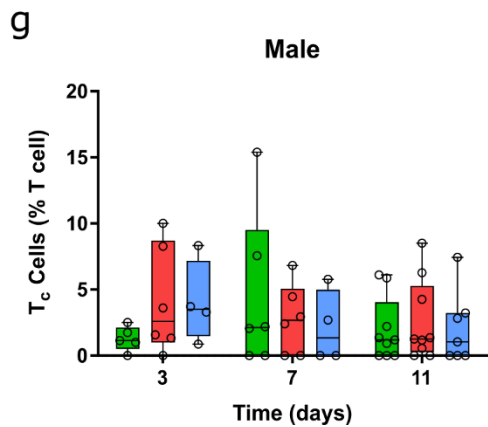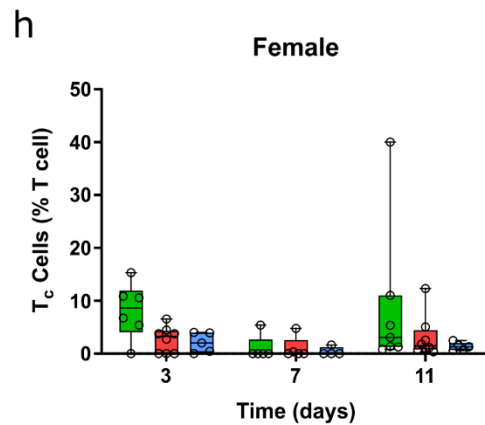

**Supplementary Figure 8: Flow cytometry of total T cells and differentiated subpopulations.** Percentages of total CD3<sup>+</sup> T cells relative to total live cells (**a, b**), and CD4<sup>+</sup> T-helper (T<sub>h</sub>) cells (**c, d**), CD4<sup>+</sup>FOXP3<sup>+</sup> regulatory T (T<sub>reg</sub>) cells (**e, f**) and CD8<sup>+</sup> cytotoxic T (T<sub>c</sub>) cells (**g, h**) relative to total T cells at three, seven, and eleven days post-injection between wild-type (green), deficient (red), and engrafted (blue) male (**a, c, e, g**) and female mice (**b, d, f, h**) with median values indicated by a black bar per group. n = 4-9 per group. Box plots display median with 25-75% percentile distribution.

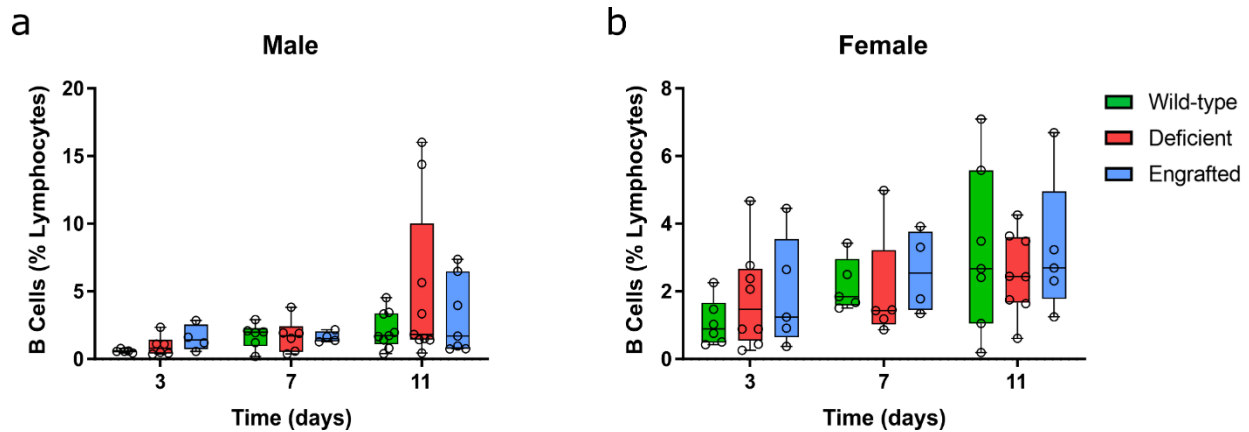

**Supplementary Figure 9: Flow cytometry of B-cells.** Percentages of CD19<sup>+</sup> B cells relative to total live cells at three, seven, and eleven days post-injection between wild-type (green), deficient (red), and engrafted (blue) male **(a)** and female mice **(b)** with median values indicated by a black bar per group. n = 4-9 per group. Box plots display median with 25-75% percentile distribution.

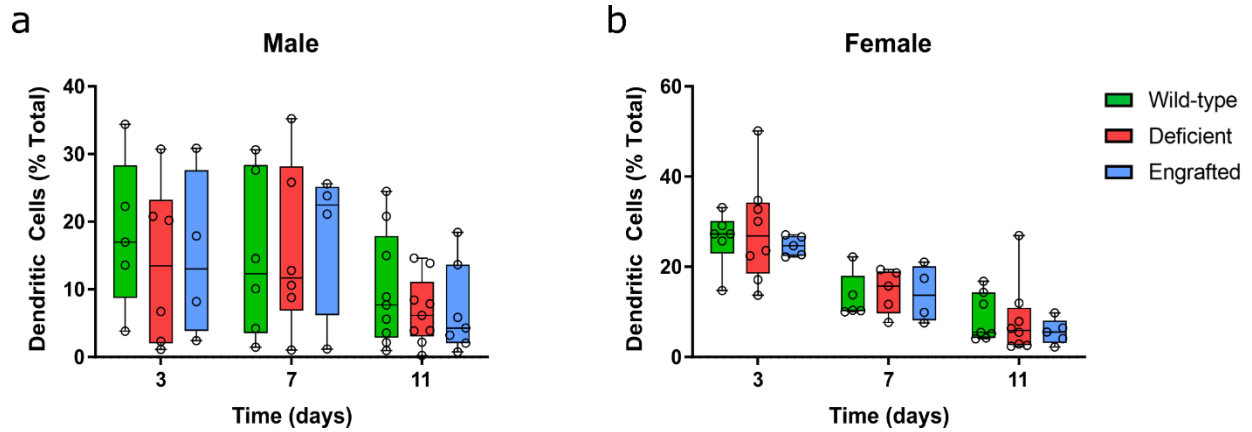

**Supplementary Figure 10: Flow cytometry of dendritic cells.** Percentages of CD11c<sup>+</sup>F4, 80<sup>-</sup> dendritic cells relative to total live cells at three, seven, and eleven days post-injection between wild-type (green), deficient (red), and engrafted (blue) male (**a**) and female mice (**b**) with median values indicated by a black bar per group. n = 4-9 per group. Box plots display median with 25-75% percentile distribution.

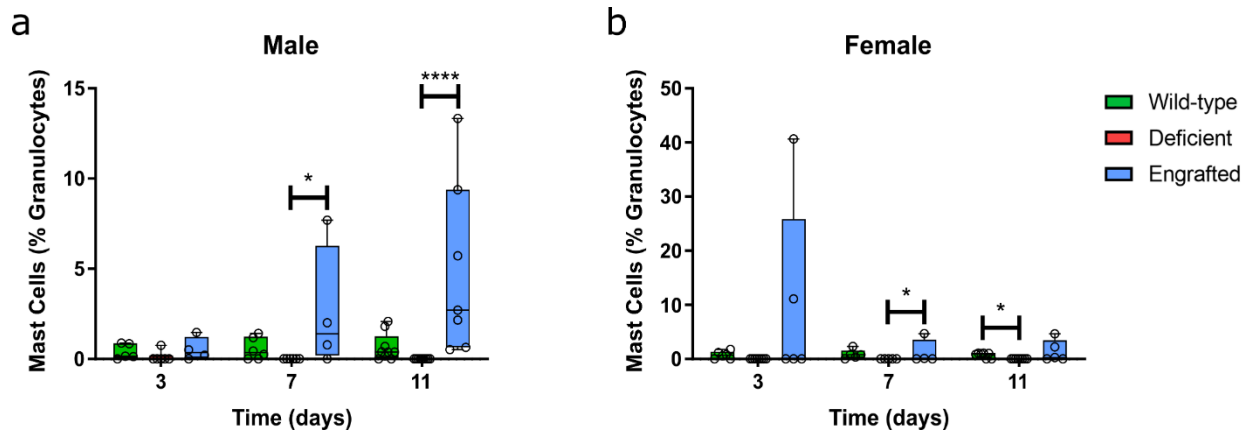

**Supplementary Figure 11: Flow cytometry of mast cells.** Percentages of CD117<sup>+</sup>FcεRI<sup>+</sup> mast cells relative to total live cells at three, seven, and eleven days post-injection between wild-type (green), deficient (red, not present), and engrafted (blue) male **(a)** and female mice **(b)**. n = 4-9 per group. Box plots display median with 25-75% percentile distribution.

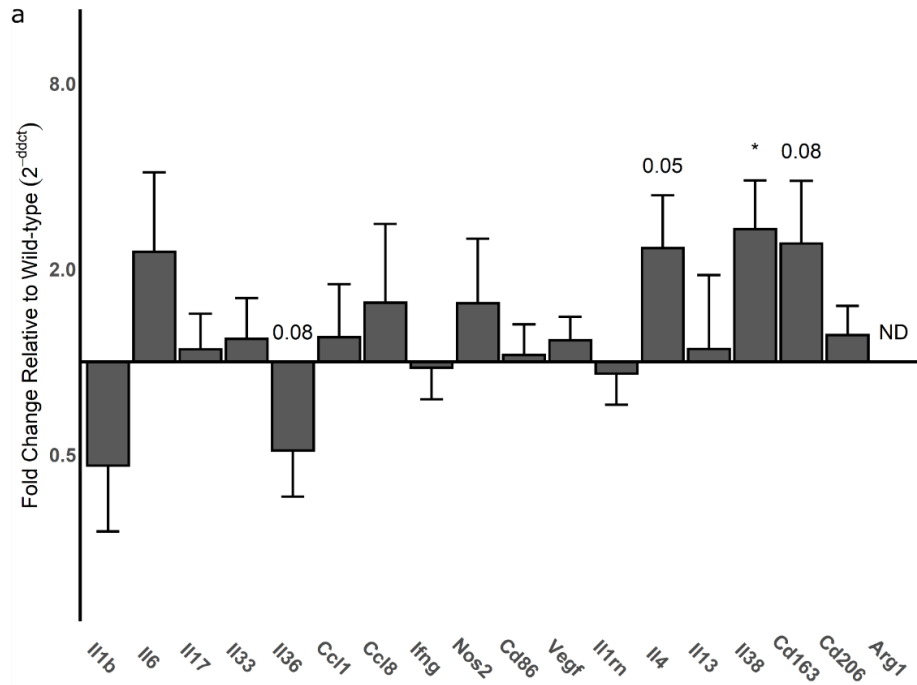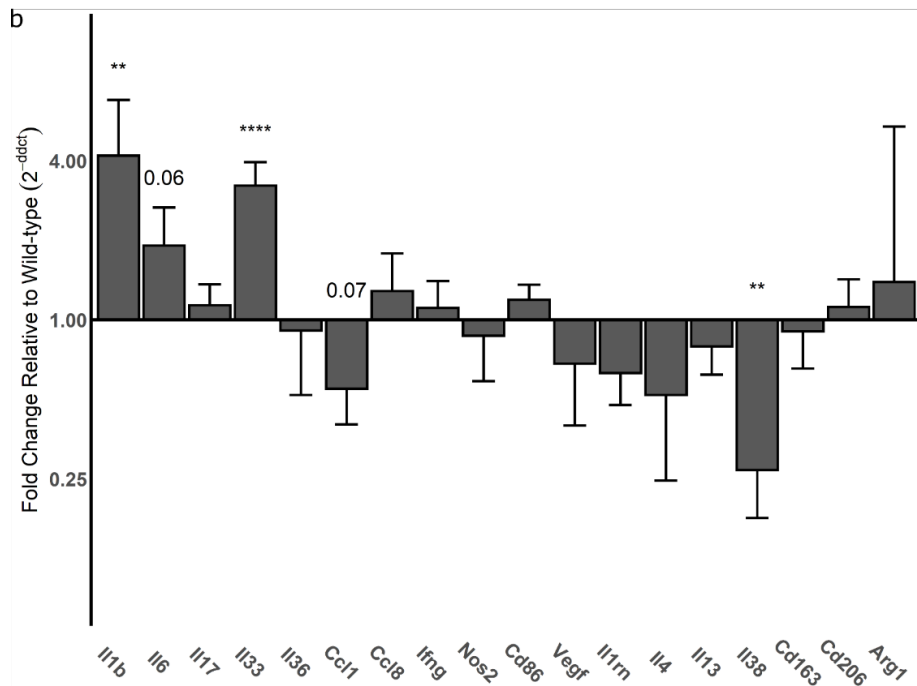

**Supplementary Figure 12: Screen of deficient versus wild-type gene expression in male mice.** qPCR results of pro-inflammatory versus pro-remodeling immune markers at day 3 (a) and day 11 (b) in male mice. Fold change and significance of deficient mouse sample gene expression was normalized relative to wild-type gene expression. Gene expression plotted as geometric mean  $\pm$  geometric SEM. (ND = not detected, value displayed for trend  $p \leq 0.1$ , \* $p < 0.05$ , \*\* $p < 0.01$ , and \*\*\*\* $p < 0.0001$ ).  $n = 11-16$  per group.

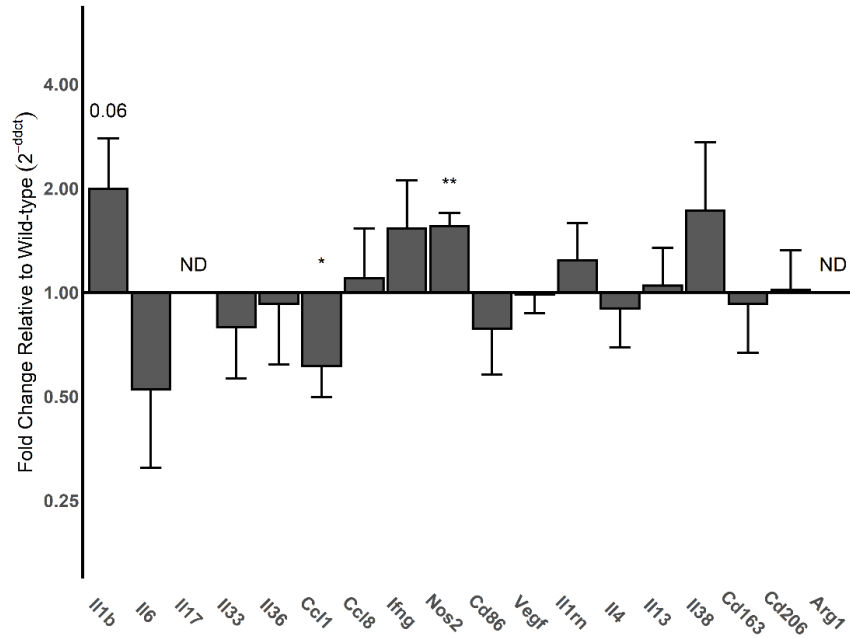

**Supplementary Figure 13: Screen of deficient versus wild-type gene expression in female mice.** qPCR results of pro-inflammatory versus pro-remodeling immune markers at day 3 in female mice. Fold change and significance of deficient mouse sample gene expression was normalized relative to wild-type gene expression. Gene expression plotted as geometric mean  $\pm$  geometric SEM. (ND = not detected, value displayed for trend  $p \leq 0.1$ ,  $*p < 0.05$ ,  $**p < 0.01$ ).  $n = 6-8$  per group.



Wild-type

Engrafted

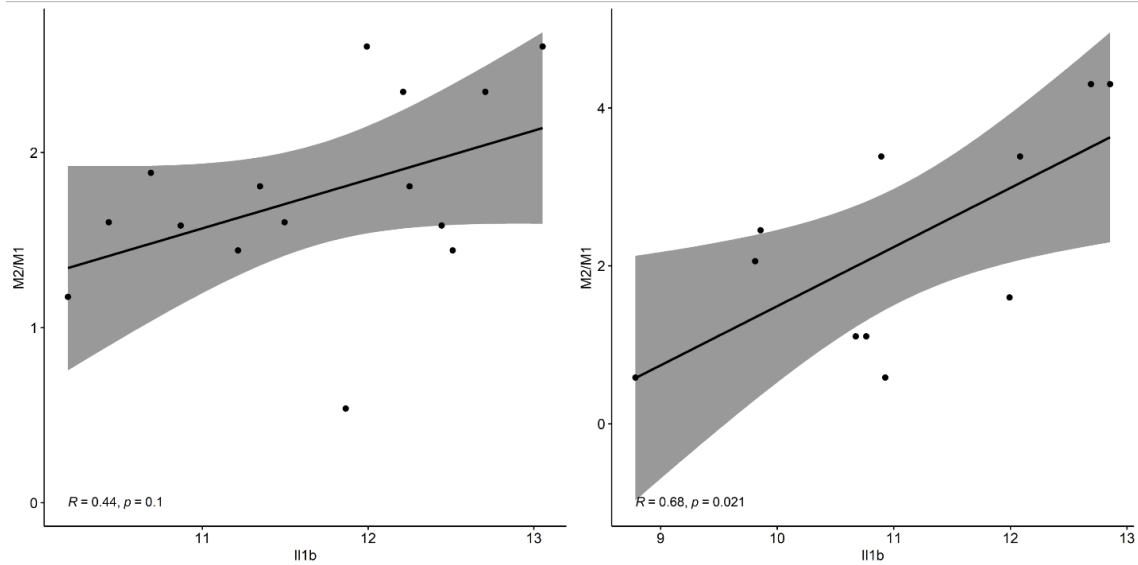

**Supplementary Figure 14: Linear regression plot of macrophage polarization ratio and Il1b gene expression.** Pearson correlation plots displaying association between M2/M1 ratio from CD206/CD86 macrophage flow ratio values and Il1b  $\Delta$ ct gene expression values for wild-type and mast cell engrafted mice. The black line displays the linear relationship between the two variables while the grey area indicates the 95% confidence interval. One outlier Il1b  $\Delta$ ct value was excluded based on being over 7 standard deviations away from the rest of the data, and various outlier tests (Grubb's, Dixon, Chi-squared tests). n = 11-15.

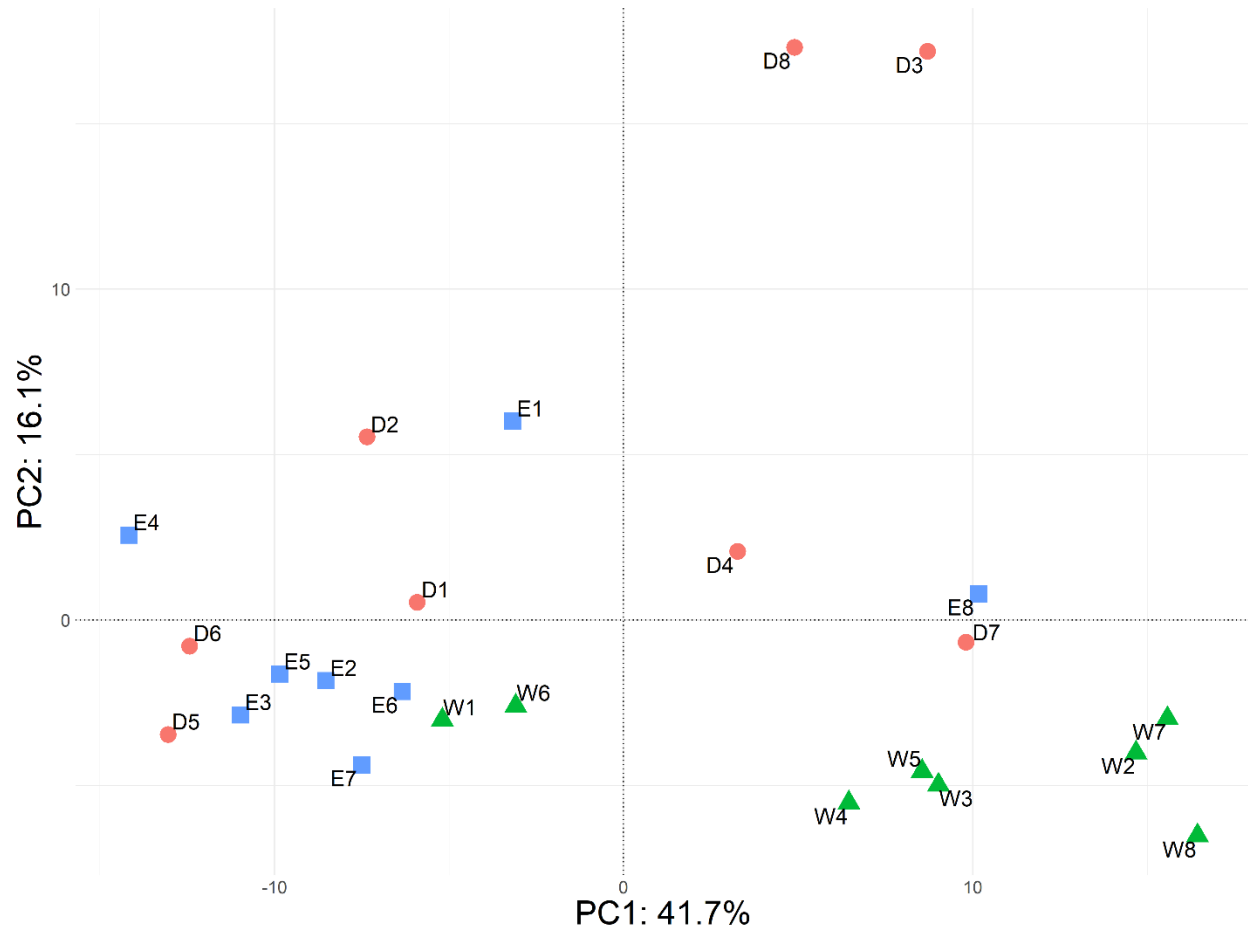

**Supplementary Figure 15: Principal component analysis plot of Nanostring nCounter data.** PC1 (41.7% of variance) versus PC2 (16.1% of variance) of the top 50% of assessed genes sorted by variance of their normalized gene expression based on the NanostringDiff package method. Points indicate wild-type, W1-W8 (green triangles), deficient, D1-D8 (red circles), and engrafted, E1-E8 (blue squares) samples. n = 8 per group.

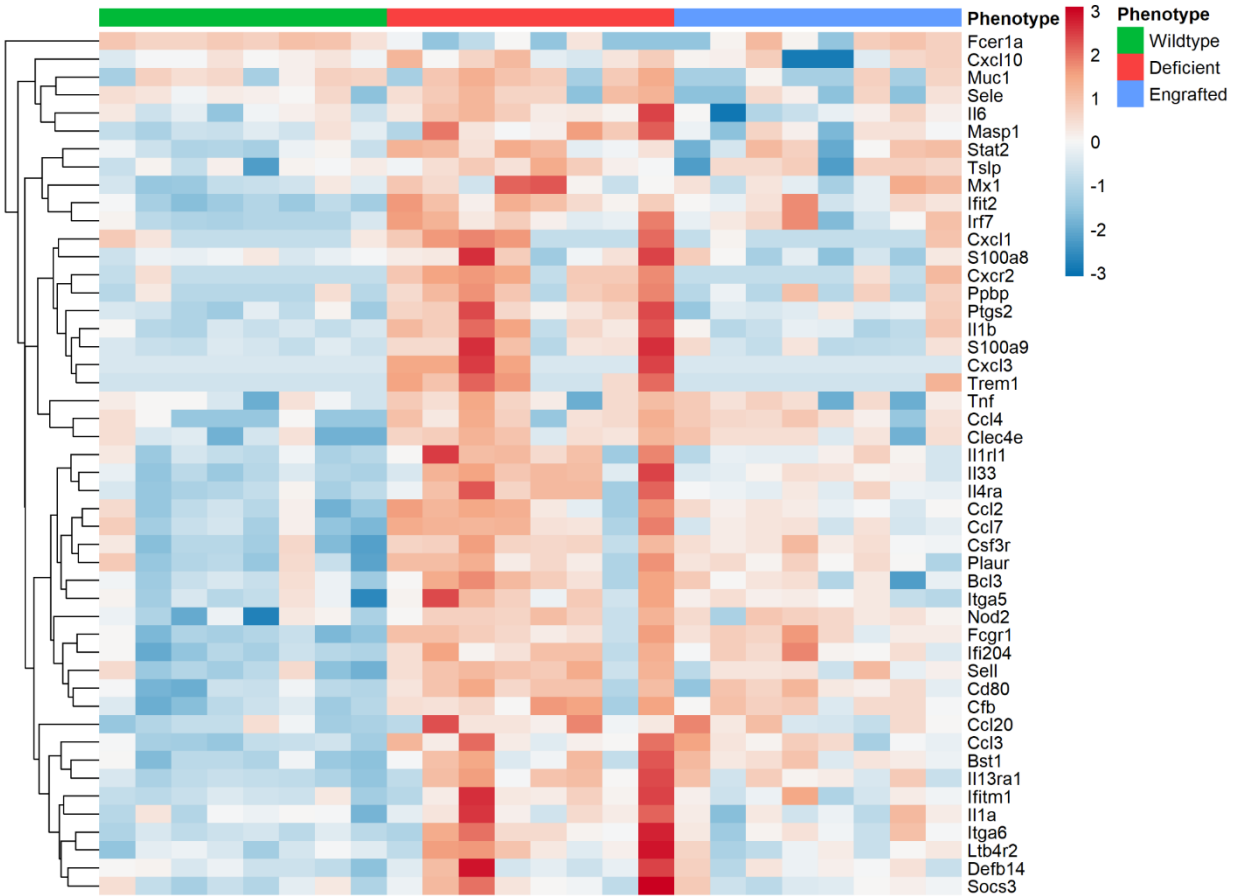

**Supplementary Figure 16: Heatmap of wild-type, deficient, engrafted gene expression.** Z-scores of differentially expressed genes based on  $q$ -value  $< 0.05$  and  $\log_2$  fold change  $\geq 1$ . Nanostring nCounter gene expression data normalized based on the NanostringDiff package<sup>2</sup> method and displayed with pheatmap package<sup>3</sup> in R. Sample ID of wild-type (top green bar), deficient (top red bar), and engrafted mouse sample (top blue bar) for male mice at day 11 post-injection. Upregulated expression in red and downregulated in blue.  $n = 8$  per group.

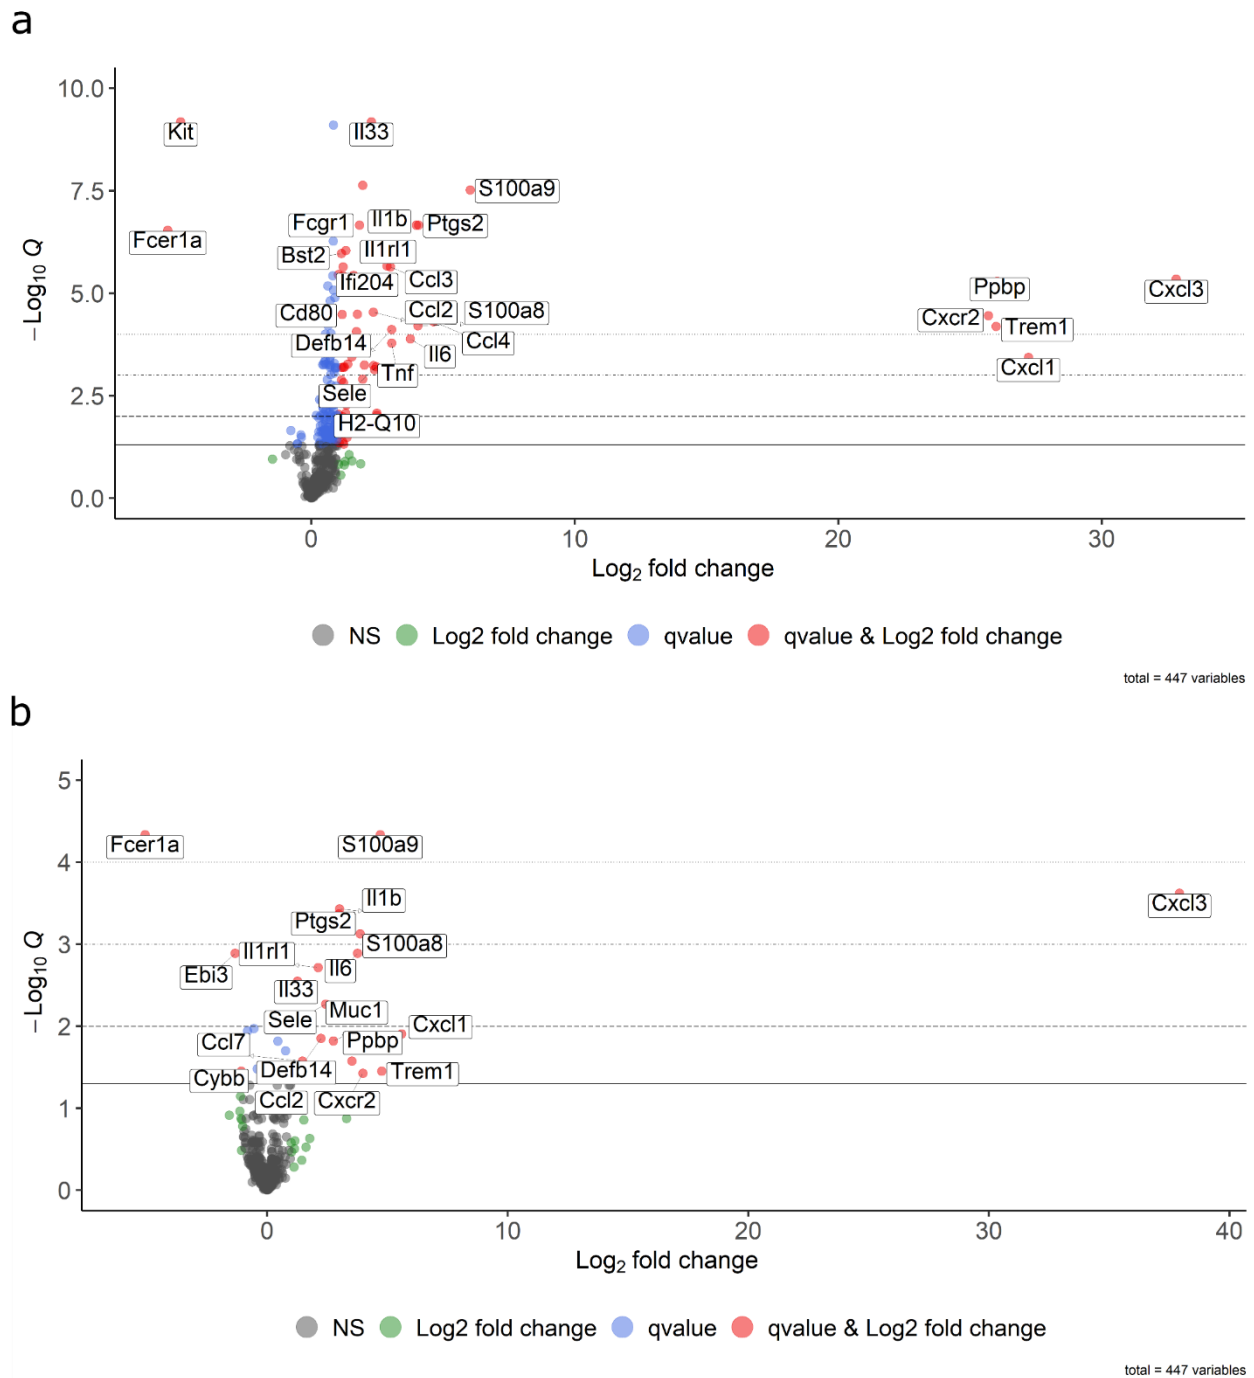

**Supplementary Figure 17: Volcano plots of pairwise comparisons for deficient response.** Top 25 ranked differentially expressed genes between deficient versus (a) wild-type and (b) engrafted sample groups with dots indicating false discovery rate less than 0.05 (blue, red), absolute fold change greater than 2 (green, red) or non-significant (black). Dashed lines indicating different significance thresholds. Results from  $n = 8$  per group pooled from 2-3 independent experiments. ( $*q < 0.05$ ,  $**q < 0.01$ ,  $***q < 0.001$  and  $****q < 0.0001$ ).

## Supplementary Tables

### Supplementary Table 1: Immune Related Primers

| Gene   | Forward Primer |                         | Reverse Primer |                            |    |
|--------|----------------|-------------------------|----------------|----------------------------|----|
| Arg1   | 5'             | GAACACGGCAGTGGCTTTAAC   | 3'             | 5' TGCTTAGTTCTGTCTGCTTTGC  | 3' |
| Ccl1   | 5'             | AGAAAGAGCTTCCCCTGAAGTTT | 3'             | 5' TGAGGCGCAGCTTTCTCTACC   | 3' |
| Ccl8   | 5'             | CCCCTTCGGGTGCTGAAAAG    | 3'             | 5' TCACTGACCCACTTCTGTGTG   | 3' |
| Cd163  | 5'             | GAGACACACGGAGCCATCAA    | 3'             | 5' CGTTAGTGACAGCAGAGGCA    | 3' |
| Cd206  | 5'             | GTGGACGCTCTAAGTGCCAT    | 3'             | 5' GAATCTGACACCCAGCGGAA    | 3' |
| Cd86   | 5'             | GACTTGAACAACCAGACTCCTG  | 3'             | 5' ATCAGCAAGACTGTCACAAAGA  | 3' |
| Gapdh* | 5'             | CATCAAGAAGGTGGTGAAGC    | 3'             | 5' GTTGTACATACCAGGAAATGAGC | 3' |
| Ifng   | 5'             | CGGCTGACTGAACTCAGATTG   | 3'             | 5' CTGCAGCTCTGAATGTTTCTTAT | 3' |
| Il13   | 5'             | GAGCAACATCACACAAGACCAGA | 3'             | 5' GGCCAGGTCCCACTCCATA     | 3' |
| Il17   | 5'             | AAGCTGGACCACCACATGAA    | 3'             | 5' CCCTGAAAGTGAAGGGGCAG    | 3' |
| Il1b   | 5'             | TGCCACCTTTTGACAGTGATG   | 3'             | 5' TGATGTGCTGCTGCGAGATT    | 3' |
| Il1rn  | 5'             | TCGGAGTACCTGTCATGCAA    | 3'             | 5' GCTTGCATCTTGCAGGGTCT    | 3' |
| Il33   | 5'             | TCCAACCTCAAGATTTCCCCG   | 3'             | 5' CAGTGCAGTAGACATGGCAGAA  | 3' |
| Il36   | 5'             | AGGGCAAACCAACTTTGCAG    | 3'             | 5' GAAGTGGAGCCCTCTATGCC    | 3' |
| Il38   | 5'             | TGCAGGAATGTGCTCCCTTC    | 3'             | 5' GGTCTAGGCCTCGGTTAGGA    | 3' |
| Il4    | 5'             | GAGACTCTTTCGGGCTTTTCG   | 3'             | 5' CAGTGATGTGGACTTGGACTC   | 3' |
| Il6    | 5'             | TCCAGTTGCCTTCTTGGGAC    | 3'             | 5' AGTCTCCTCTCCGACTTGT     | 3' |
| Nos2   | 5'             | CAGCTGGGCTGTACAAACCTT   | 3'             | 5' CATTGGAAGTGAAGCGTTTCG   | 3' |
| Vegf   | 5'             | GCACATAGAGAGAATGAGCTTCC | 3'             | 5' CTCCGCTCTGAACAAGGCT     | 3' |

\*Housekeeping Gene

### Supplementary Table 2: Estrogen Receptor Primers

| Gene   | Forward Primer |                       | Reverse Primer |                           |    |
|--------|----------------|-----------------------|----------------|---------------------------|----|
| Esr1   | 5'             | ACGCTCTGCCTTGATCACAC  | 3'             | 5' CGAGTTACAGACTGGCTCCC   | 3' |
| Esr2   | 5'             | GGTCTGTGAAGGATGTAAGGC | 3'             | 5' TAACACTTGCGAAGTCGGCAGG | 3' |
| Gapdh* | 5'             | CCCCTTCGGGTGCTGAAAAG  | 3'             | 5' TCACTGACCCACTTCTGTGTG  | 3' |

\*Housekeeping Gene

**Supplementary Table 3: Differentially Expressed Genes (q < 0.05)**

| Gene    | Entrez ID | logFC      | pvalue     | qvalue     | Comparison* |
|---------|-----------|------------|------------|------------|-------------|
| Bcl3    | 12051     | 0.96169649 | 0.0001054  | 0.00120808 | Def:OG      |
| Bst1    | 12182     | 1.11830749 | 0.00019134 | 0.00194389 | Def:OG      |
| Bst2    | 69550     | 0.53603854 | 0.00200392 | 0.01518222 | Def:OG      |
| Casp8   | 12370     | 0.41918401 | 6.3543E-05 | 0.0008354  | Def:OG      |
| Ccl2    | 20296     | 1.89680656 | 1.1491E-06 | 2.7034E-05 | Def:OG      |
| Ccl20   | 20297     | 1.24219447 | 0.00354698 | 0.02331616 | Def:OG      |
| Ccl3    | 20302     | 2.00175485 | 3.4153E-06 | 7.2697E-05 | Def:OG      |
| Ccl4    | 20303     | 3.21048965 | 8.3207E-06 | 0.00015497 | Def:OG      |
| Ccl7    | 20306     | 1.76375961 | 2.5692E-06 | 5.7422E-05 | Def:OG      |
| Cd24a   | 12484     | 0.60596165 | 0.00347673 | 0.02319547 | Def:OG      |
| Cd44    | 12505     | 0.48739085 | 9.7481E-05 | 0.00114668 | Def:OG      |
| Cd80    | 12519     | 0.71598694 | 0.00053364 | 0.00496955 | Def:OG      |
| Cd82    | 12521     | -0.393306  | 0.00322404 | 0.02251787 | Def:OG      |
| Cebpb   | 12608     | 0.34623001 | 0.00605416 | 0.03707135 | Def:OG      |
| Cfb     | 14962     | 0.71651477 | 0.00013146 | 0.00143328 | Def:OG      |
| Clec4e  | 56619     | 2.65412174 | 0.00024281 | 0.00235949 | Def:OG      |
| Csf3r   | 12986     | 0.81387742 | 0.00096219 | 0.0081151  | Def:OG      |
| Cxcl1   | 14825     | 16.4075754 | 5.8602E-12 | 6.4495E-10 | Def:OG      |
| Cxcl10  | 15945     | 1.45361867 | 0.00563    | 0.03495291 | Def:OG      |
| Cxcl3   | 330122    | 35.376083  | 5.8602E-12 | 6.4495E-10 | Def:OG      |
| Cxcr2   | 12765     | 14.8415238 | 1.023E-07  | 3.5177E-06 | Def:OG      |
| Ddx58   | 230073    | 0.51773177 | 6.5056E-07 | 1.8175E-05 | Def:OG      |
| Defb14  | 244332    | 2.64540291 | 3.6017E-07 | 1.0733E-05 | Def:OG      |
| Ets1    | 23871     | 0.35799557 | 0.00261322 | 0.0191493  | Def:OG      |
| Fcer1a  | 14125     | -5.2553055 | 5.7668E-09 | 2.8642E-07 | Def:OG      |
| Fcgr1   | 14129     | 0.96576671 | 0.00013777 | 0.00146626 | Def:OG      |
| Hif1a   | 15251     | 0.48622925 | 0.0006305  | 0.00563664 | Def:OG      |
| Ifi204  | 15951     | 0.89305581 | 0.00036756 | 0.00349577 | Def:OG      |
| Ifi35   | 70110     | 0.53015351 | 1.9779E-05 | 0.00034004 | Def:OG      |
| Ifih1   | 71586     | 0.41702725 | 0.00328498 | 0.02259054 | Def:OG      |
| Ifit2   | 15958     | 1.21375544 | 1.0835E-06 | 2.6907E-05 | Def:OG      |
| Ifitm1  | 68713     | 1.52645206 | 2.1919E-05 | 0.00036288 | Def:OG      |
| Il13ra1 | 16164     | 0.71734686 | 1.1495E-05 | 0.00020552 | Def:OG      |
| Il15ra  | 16169     | 0.55385611 | 0.00556318 | 0.03495291 | Def:OG      |
| Il1a    | 16175     | 0.78386753 | 0.00165205 | 0.01367528 | Def:OG      |
| Il1b    | 16176     | 3.49598248 | 6.5569E-12 | 6.4495E-10 | Def:OG      |
| Il1r1   | 16177     | 0.44052214 | 2.8016E-05 | 0.00043183 | Def:OG      |
| Il1r1l  | 17082     | 2.50021835 | 1.4854E-09 | 9.4853E-08 | Def:OG      |
| Il1r12  | 107527    | 0.49937012 | 6.3963E-06 | 0.00012431 | Def:OG      |
| Il1rn   | 16181     | 0.38248162 | 3.7373E-06 | 7.5936E-05 | Def:OG      |
| Il33    | 77125     | 1.77680895 | 8.6571E-12 | 6.4495E-10 | Def:OG      |

| Gene    | Entrez ID | logFC      | pvalue     | qvalue     | Comparison* |
|---------|-----------|------------|------------|------------|-------------|
| Il4ra   | 16190     | 1.0450472  | 8.1054E-08 | 3.0192E-06 | Def:OG      |
| Il6     | 16193     | 3.76027532 | 1.8364E-08 | 7.4625E-07 | Def:OG      |
| Irak4   | 266632    | 0.39825528 | 0.00748803 | 0.04523173 | Def:OG      |
| Irf7    | 54123     | 1.07333276 | 0.00057388 | 0.00523522 | Def:OG      |
| Irgm1   | 15944     | 0.55583698 | 0.00378445 | 0.02451666 | Def:OG      |
| Itga5   | 16402     | 0.74098199 | 0.00017107 | 0.00177831 | Def:OG      |
| Itga6   | 16403     | 0.70216696 | 4.8938E-05 | 0.00066289 | Def:OG      |
| Itgb1   | 16412     | 0.32268046 | 0.00388622 | 0.02481629 | Def:OG      |
| Ltb4r1  | 16995     | 0.62696043 | 0.00186815 | 0.0147091  | Def:OG      |
| Ltb4r2  | 57260     | 0.88227927 | 3.2843E-05 | 0.00048936 | Def:OG      |
| Masp1   | 17174     | 1.08401375 | 4.3613E-05 | 0.00060923 | Def:OG      |
| Muc1    | 17829     | 2.38449534 | 6.7877E-05 | 0.00085887 | Def:OG      |
| Mx1     | 17857     | 0.69838439 | 0.00342332 | 0.0231852  | Def:OG      |
| Myd88   | 17874     | 0.52374775 | 6.9171E-05 | 0.00085887 | Def:OG      |
| Nfkb2   | 18034     | 0.4546497  | 0.00011362 | 0.00126975 | Def:OG      |
| Nfkbiz  | 80859     | 0.5066325  | 0.00090254 | 0.00791052 | Def:OG      |
| Nod2    | 257632    | 0.85099095 | 0.0030613  | 0.02172063 | Def:OG      |
| Pecam1  | 18613     | 0.53061448 | 0.00214905 | 0.0160104  | Def:OG      |
| Plaur   | 18793     | 0.86125994 | 0.00193183 | 0.01488841 | Def:OG      |
| Pml     | 18854     | 0.36928278 | 0.00290669 | 0.02095628 | Def:OG      |
| Ppbp    | 57349     | 14.7815329 | 1.1364E-08 | 5.0795E-07 | Def:OG      |
| Ptger4  | 19219     | -0.3622475 | 0.00772546 | 0.04604376 | Def:OG      |
| Ptgs2   | 19225     | 3.52974826 | 7.3744E-12 | 6.4495E-10 | Def:OG      |
| S100a8  | 20201     | 3.95652448 | 3.4136E-09 | 1.9074E-07 | Def:OG      |
| S100a9  | 20202     | 5.36769599 | 5.8602E-12 | 6.4495E-10 | Def:OG      |
| Sele    | 20339     | 2.4500527  | 1.0485E-06 | 2.6907E-05 | Def:OG      |
| Sell    | 20343     | 1.7640824  | 0.00021234 | 0.00210923 | Def:OG      |
| Socs3   | 12702     | 1.10046276 | 8.4556E-05 | 0.00102153 | Def:OG      |
| Stat2   | 20847     | 0.81681082 | 0.00187566 | 0.0147091  | Def:OG      |
| Stat3   | 20848     | 0.51366144 | 3.531E-05  | 0.00050915 | Def:OG      |
| Thy1    | 21838     | 0.44147497 | 0.00092949 | 0.00799008 | Def:OG      |
| Tnf     | 21926     | 2.29002659 | 2.2793E-05 | 0.00036388 | Def:OG      |
| Tnfrsf4 | 22163     | 0.37668453 | 0.00789556 | 0.04643838 | Def:OG      |
| Trem1   | 58217     | 15.3797873 | 1.391E-07  | 4.4414E-06 | Def:OG      |
| Tslp    | 53603     | 1.50058921 | 0.00181989 | 0.0147091  | Def:OG      |
| Ahr     | 11622     | 0.56448308 | 0.01603709 | 0.03733635 | Def:WT      |
| Arhgdib | 11857     | 0.74408796 | 0.00072    | 0.00357599 | Def:WT      |
| B2m     | 12010     | 0.73373826 | 0.00016113 | 0.00096035 | Def:WT      |
| Batf    | 53314     | 0.97972046 | 0.00098494 | 0.0043763  | Def:WT      |
| Bcap31  | 27061     | 0.19091078 | 0.00251655 | 0.00948378 | Def:WT      |
| Bcl3    | 12051     | 1.15886217 | 9.7302E-05 | 0.0006467  | Def:WT      |
| Bcl6    | 12053     | 0.43173393 | 0.00764583 | 0.02233781 | Def:WT      |

| Gene    | Entrez ID | logFC      | pvalue     | qvalue     | Comparison* |
|---------|-----------|------------|------------|------------|-------------|
| Bid     | 12122     | 0.60422495 | 0.00022318 | 0.00129557 | Def:WT      |
| Bst1    | 12182     | 1.74871239 | 1.9755E-06 | 3.2706E-05 | Def:WT      |
| Bst2    | 69550     | 1.1462163  | 2.9051E-08 | 1.0821E-06 | Def:WT      |
| Btk     | 12229     | 0.78436174 | 0.01469296 | 0.03550138 | Def:WT      |
| C1qa    | 12259     | 0.82884942 | 0.01279229 | 0.03212446 | Def:WT      |
| C1qb    | 12260     | 0.79389141 | 0.02096143 | 0.04732201 | Def:WT      |
| C1ra    | 50909     | 0.66905654 | 0.00782752 | 0.02257356 | Def:WT      |
| C1s1    | 50908     | 0.65018012 | 0.01103375 | 0.02867493 | Def:WT      |
| C3      | 12266     | 1.35668245 | 0.0131766  | 0.0327219  | Def:WT      |
| Card9   | 332579    | 0.84414501 | 0.00053554 | 0.00278358 | Def:WT      |
| Casp1   | 12362     | 0.47241089 | 7.2879E-05 | 0.00055215 | Def:WT      |
| Casp3   | 12367     | 0.24734896 | 0.01305265 | 0.03259517 | Def:WT      |
| Casp8   | 12370     | 0.62830888 | 3.2871E-07 | 6.6789E-06 | Def:WT      |
| Ackr2   | 59289     | 1.23142366 | 0.0220897  | 0.04816632 | Def:WT      |
| Ccl12   | 20293     | 1.19497619 | 0.00289159 | 0.01034034 | Def:WT      |
| Ccl2    | 20296     | 2.35594181 | 1.6847E-06 | 2.8964E-05 | Def:WT      |
| Ccl20   | 20297     | 1.95238181 | 0.00021455 | 0.00126191 | Def:WT      |
| Ccl3    | 20302     | 3.00319881 | 7.7016E-08 | 2.2951E-06 | Def:WT      |
| Ccl4    | 20303     | 4.64745749 | 3.3363E-06 | 4.9711E-05 | Def:WT      |
| Ccl6    | 20305     | 1.42542436 | 0.00581636 | 0.01793045 | Def:WT      |
| Ccl7    | 20306     | 2.05645603 | 1.1091E-05 | 0.00013046 | Def:WT      |
| Ccl9    | 20308     | 1.30645127 | 0.00973316 | 0.02636134 | Def:WT      |
| Ccr5    | 12774     | 1.11409207 | 0.01061065 | 0.02789977 | Def:WT      |
| Ccr12   | 54199     | 2.01562382 | 7.685E-05  | 0.00057253 | Def:WT      |
| Cd109   | 235505    | 0.43685867 | 0.00495218 | 0.01604074 | Def:WT      |
| Cd14    | 12475     | 1.53795107 | 3.9396E-05 | 0.00035939 | Def:WT      |
| Cd244a  | 18106     | 1.03728775 | 0.00235414 | 0.00907154 | Def:WT      |
| Cd24a   | 12484     | 0.56175483 | 0.0218067  | 0.04778232 | Def:WT      |
| Cd274   | 60533     | 0.91238478 | 0.00762245 | 0.02233781 | Def:WT      |
| Cd44    | 12505     | 0.44733897 | 0.00235027 | 0.00907154 | Def:WT      |
| Cd53    | 12508     | 1.10907501 | 0.00978967 | 0.02636134 | Def:WT      |
| Cd80    | 12519     | 1.17588156 | 2.0751E-06 | 3.3128E-05 | Def:WT      |
| Cd81    | 12520     | 0.29819965 | 0.02172157 | 0.04778232 | Def:WT      |
| Cd86    | 12524     | 0.73473587 | 0.00297494 | 0.01055397 | Def:WT      |
| Adgre5  | 26364     | 0.73148057 | 0.01039545 | 0.02765931 | Def:WT      |
| Ceacam1 | 26365     | 0.68300415 | 0.00995719 | 0.02665188 | Def:WT      |
| Cfb     | 14962     | 1.20903654 | 7.2585E-08 | 2.2951E-06 | Def:WT      |
| Cfh     | 12628     | 0.81080907 | 0.01399221 | 0.03399195 | Def:WT      |
| Cfp     | 18636     | 1.08392498 | 0.00373887 | 0.01247219 | Def:WT      |
| Clec4e  | 56619     | 3.68941811 | 0.00012863 | 0.00078761 | Def:WT      |
| Clec5a  | 23845     | 0.89480075 | 0.00570523 | 0.01783383 | Def:WT      |
| Cmklr1  | 14747     | 0.64798096 | 0.00605902 | 0.01842437 | Def:WT      |



| Gene    | Entrez ID | logFC      | pvalue     | qvalue     | Comparison* |
|---------|-----------|------------|------------|------------|-------------|
| Csf1    | 12977     | 0.8973911  | 1.3141E-05 | 0.0001458  | Def:WT      |
| Csf2rb  | 12983     | 0.98938871 | 0.00261556 | 0.00958322 | Def:WT      |
| Csf3r   | 12986     | 1.29171056 | 1.3373E-05 | 0.0001458  | Def:WT      |
| Ctnnb1  | 12387     | -0.3753829 | 0.01336422 | 0.03300445 | Def:WT      |
| Ctsc    | 13032     | 0.33712772 | 0.01843356 | 0.04247321 | Def:WT      |
| Cxcl1   | 14825     | 27.2214946 | 4.2216E-05 | 0.00037001 | Def:WT      |
| Cxcl10  | 15945     | 1.77015962 | 0.00624591 | 0.01886433 | Def:WT      |
| Cxcl13  | 55985     | 2.49354743 | 0.00259948 | 0.00958322 | Def:WT      |
| Cxcl3   | 330122    | 32.8314335 | 2.0417E-07 | 4.5632E-06 | Def:WT      |
| Cxcr2   | 12765     | 25.7009567 | 2.2868E-06 | 3.5248E-05 | Def:WT      |
| Ddx58   | 230073    | 0.84718634 | 5.3728E-12 | 8.0055E-10 | Def:WT      |
| Defb14  | 244332    | 3.04643048 | 5.8316E-06 | 7.6668E-05 | Def:WT      |
| Entpd1  | 12495     | 0.86670259 | 0.00014679 | 0.0008867  | Def:WT      |
| Ets1    | 23871     | 0.55380947 | 6.8971E-05 | 0.00054088 | Def:WT      |
| Fas     | 14102     | 0.78941453 | 0.00063847 | 0.00320668 | Def:WT      |
| Fasl    | 14103     | 1.19844211 | 0.01863119 | 0.04270843 | Def:WT      |
| Fcer1a  | 14125     | -5.4444058 | 5.9105E-09 | 2.9355E-07 | Def:WT      |
| Fcer1g  | 14127     | 0.94957757 | 0.00260382 | 0.00958322 | Def:WT      |
| Fcgr1   | 14129     | 1.82930655 | 3.9407E-09 | 2.2018E-07 | Def:WT      |
| Fcgr4   | 246256    | 1.57436952 | 0.00078751 | 0.00382629 | Def:WT      |
| Fkbp5   | 14229     | 0.80061768 | 0.02127086 | 0.04754037 | Def:WT      |
| Gata3   | 14462     | -0.5221126 | 0.02174266 | 0.04778232 | Def:WT      |
| Gm10499 | 69717     | 0.75305572 | 0.0003068  | 0.00171424 | Def:WT      |
| H2-K1   | 14972     | 0.542672   | 0.00042207 | 0.00227309 | Def:WT      |
| H2-Q10  | 15007     | 2.48664674 | 0.00215424 | 0.00851692 | Def:WT      |
| Icam1   | 15894     | 0.58431184 | 0.00087012 | 0.0040515  | Def:WT      |
| Ifi204  | 15951     | 1.6055303  | 1.3978E-07 | 3.6755E-06 | Def:WT      |
| Ifi35   | 70110     | 0.83646589 | 1.2039E-08 | 5.3814E-07 | Def:WT      |
| Ifh1    | 71586     | 0.84535918 | 4.3475E-07 | 8.4493E-06 | Def:WT      |
| Ifit2   | 15958     | 1.95861349 | 2.0999E-10 | 2.3466E-08 | Def:WT      |
| Ifitm1  | 68713     | 1.8946873  | 2.0976E-05 | 0.00019534 | Def:WT      |
| Ifnar1  | 15975     | 0.28940976 | 0.00313488 | 0.0110338  | Def:WT      |
| Ifnar2  | 15976     | 0.65556645 | 0.0021103  | 0.00842237 | Def:WT      |
| Ifngr1  | 15979     | 0.72656073 | 0.00891404 | 0.02474893 | Def:WT      |
| Ikbke   | 56489     | 0.74465874 | 7.9656E-05 | 0.0005743  | Def:WT      |
| Ikzf1   | 22778     | 0.98136072 | 0.00875728 | 0.02461953 | Def:WT      |
| Il10ra  | 16154     | 0.71577211 | 0.01782327 | 0.04127979 | Def:WT      |
| Il10rb  | 16155     | 0.63117993 | 0.0124124  | 0.03134656 | Def:WT      |
| Il13ra1 | 16164     | 1.03084143 | 1.2727E-07 | 3.5556E-06 | Def:WT      |
| Il15ra  | 16169     | 0.91312133 | 0.00010964 | 0.00069027 | Def:WT      |
| Il16    | 16170     | 0.60970361 | 0.01520224 | 0.03624722 | Def:WT      |
| Il17ra  | 16172     | 0.48880153 | 0.00095048 | 0.00433537 | Def:WT      |

| Gene    | Entrez ID | logFC      | pvalue     | qvalue     | Comparison* |
|---------|-----------|------------|------------|------------|-------------|
| Il18    | 16173     | 0.54204873 | 0.0121307  | 0.03098528 | Def:WT      |
| Il18rap | 16174     | 1.36202952 | 0.00664958 | 0.01994873 | Def:WT      |
| Il1a    | 16175     | 0.87760667 | 0.00285454 | 0.01029015 | Def:WT      |
| Il1b    | 16176     | 3.98437347 | 3.9322E-09 | 2.2018E-07 | Def:WT      |
| Il1r1   | 16177     | 0.49558386 | 5.786E-05  | 0.00047895 | Def:WT      |
| Il1rap  | 16180     | 0.3687875  | 0.02229761 | 0.04838365 | Def:WT      |
| Il1r11  | 17082     | 2.87567927 | 6.3562E-08 | 2.1855E-06 | Def:WT      |
| Il1r12  | 107527    | 0.55496161 | 1.9456E-05 | 0.00018504 | Def:WT      |
| Il1rn   | 16181     | 0.4171664  | 1.5351E-05 | 0.00015248 | Def:WT      |
| Il2rg   | 16186     | 0.8864661  | 0.00119465 | 0.00513472 | Def:WT      |
| Il33    | 77125     | 2.28437285 | 2.9817E-12 | 6.6642E-10 | Def:WT      |
| Il4ra   | 16190     | 1.31811485 | 2.2473E-08 | 9.1322E-07 | Def:WT      |
| Il6     | 16193     | 3.75964139 | 1.1457E-05 | 0.00013132 | Def:WT      |
| Il6ra   | 16194     | 0.70047987 | 0.01057268 | 0.02789977 | Def:WT      |
| Il6st   | 16195     | 0.43193261 | 0.00935909 | 0.02566504 | Def:WT      |
| Irak2   | 108960    | 0.53555608 | 8.2775E-06 | 0.0001     | Def:WT      |
| Irak3   | 73914     | 0.67598444 | 0.00117042 | 0.00507939 | Def:WT      |
| Irak4   | 266632    | 0.71024537 | 4.9622E-05 | 0.00042656 | Def:WT      |
| Irf5    | 27056     | 0.65679115 | 0.00732106 | 0.02167228 | Def:WT      |
| Irf7    | 54123     | 1.71775196 | 6.7991E-06 | 8.6835E-05 | Def:WT      |
| Irf8    | 15900     | 0.8690524  | 0.00514048 | 0.01653091 | Def:WT      |
| Irgm1   | 15944     | 1.20037553 | 1.6096E-07 | 3.7869E-06 | Def:WT      |
| Itga4   | 16401     | 0.8094452  | 0.00098104 | 0.0043763  | Def:WT      |
| Itga5   | 16402     | 0.91101173 | 0.00010101 | 0.00064725 | Def:WT      |
| Itga6   | 16403     | 0.89330619 | 1.4194E-05 | 0.00014726 | Def:WT      |
| Itgal   | 16408     | 0.79410903 | 0.00134936 | 0.00569022 | Def:WT      |
| Itgam   | 16409     | 1.16493811 | 0.00440876 | 0.01457127 | Def:WT      |
| Itgb1   | 16412     | 0.53003901 | 5.1008E-05 | 0.0004302  | Def:WT      |
| Jak1    | 16451     | 0.65924119 | 1.4288E-05 | 0.00014726 | Def:WT      |
| Jak2    | 16452     | 0.44926921 | 0.001598   | 0.00661395 | Def:WT      |
| Jak3    | 16453     | 0.65026171 | 0.0106753  | 0.02790562 | Def:WT      |
| Kit     | 16590     | -4.9558404 | 2.9817E-12 | 6.6642E-10 | Def:WT      |
| Lcp2    | 16822     | 1.32940849 | 0.00126113 | 0.00536881 | Def:WT      |
| Pirb    | 18733     | 1.14403175 | 0.00023143 | 0.00132625 | Def:WT      |
| Lilrb4a | 14728     | 1.03478993 | 0.00575915 | 0.01787735 | Def:WT      |
| Litaf   | 56722     | 0.51827679 | 0.00695844 | 0.02073614 | Def:WT      |
| Ltb4r1  | 16995     | 0.79560927 | 0.00083028 | 0.00394824 | Def:WT      |
| Ltb4r2  | 57260     | 0.9657837  | 0.00010136 | 0.00064725 | Def:WT      |
| Ltbr    | 17000     | 0.31549049 | 0.00083928 | 0.00394902 | Def:WT      |
| Ly96    | 17087     | 0.72330096 | 4.0763E-05 | 0.00036442 | Def:WT      |
| Masp1   | 17174     | 1.25132012 | 9.0271E-05 | 0.0006222  | Def:WT      |
| Msr1    | 20288     | 1.30256347 | 0.0021721  | 0.00851692 | Def:WT      |

| Gene   | Entrez ID | logFC      | pvalue     | qvalue     | Comparison* |
|--------|-----------|------------|------------|------------|-------------|
| Muc1   | 17829     | 2.01435614 | 0.00360269 | 0.01229316 | Def:WT      |
| Mx1    | 17857     | 0.99363692 | 0.00047026 | 0.00247302 | Def:WT      |
| Myd88  | 17874     | 0.81523006 | 1.5428E-07 | 3.7869E-06 | Def:WT      |
| Ncf4   | 17972     | 0.86543997 | 0.01524492 | 0.03624722 | Def:WT      |
| Nfatc1 | 18018     | 0.71225062 | 9.503E-05  | 0.00064361 | Def:WT      |
| Nfatc2 | 18019     | 0.55498507 | 0.00368462 | 0.01238366 | Def:WT      |
| Nfkb1  | 18033     | 0.43732891 | 7.1734E-05 | 0.00055215 | Def:WT      |
| Nfkb2  | 18034     | 0.63548606 | 4.4024E-06 | 6.2726E-05 | Def:WT      |
| Nfkbia | 18035     | 0.54538593 | 0.00476453 | 0.01554557 | Def:WT      |
| Nfkbiz | 80859     | 0.89627854 | 6.9011E-07 | 1.2853E-05 | Def:WT      |
| Nod2   | 257632    | 1.38639349 | 6.7525E-05 | 0.000539   | Def:WT      |
| Notch1 | 18128     | -0.533063  | 0.02166384 | 0.04778232 | Def:WT      |
| Nox4   | 50490     | 0.99090246 | 0.00566374 | 0.01782881 | Def:WT      |
| Pdgfrb | 18596     | 0.48574117 | 0.02073456 | 0.04704745 | Def:WT      |
| Pecam1 | 18613     | 0.66702852 | 0.00107554 | 0.0047134  | Def:WT      |
| Plau   | 18792     | 0.72514788 | 0.0148094  | 0.03559033 | Def:WT      |
| Plaur  | 18793     | 1.1781171  | 0.00041479 | 0.00226109 | Def:WT      |
| Pml    | 18854     | 0.63024412 | 1.4496E-05 | 0.00014726 | Def:WT      |
| Pou2f2 | 18987     | 0.71405486 | 0.00203624 | 0.0082     | Def:WT      |
| Ppbp   | 57349     | 26.0377163 | 2.4465E-07 | 5.2076E-06 | Def:WT      |
| Psmb10 | 19171     | 0.75852374 | 0.00242369 | 0.00925973 | Def:WT      |
| Psmb9  | 16912     | 0.62024577 | 0.00840313 | 0.02392484 | Def:WT      |
| Ptafr  | 19204     | 0.91317796 | 0.00443332 | 0.01457127 | Def:WT      |
| Ptger4 | 19219     | -0.3897851 | 0.01110418 | 0.02869115 | Def:WT      |
| Ptgs2  | 19225     | 4.07435572 | 3.1602E-09 | 2.2018E-07 | Def:WT      |
| Ptpn22 | 19260     | 0.98953642 | 0.00941626 | 0.02566504 | Def:WT      |
| Ptpn6  | 15170     | 0.74282868 | 7.7544E-06 | 9.6284E-05 | Def:WT      |
| Ptprc  | 19264     | 0.7775139  | 0.01571891 | 0.03710537 | Def:WT      |
| Rela   | 19697     | 0.34589487 | 0.00268787 | 0.0097681  | Def:WT      |
| Relb   | 19698     | 0.51016166 | 0.00252476 | 0.00948378 | Def:WT      |
| S100a8 | 20201     | 4.04777647 | 4.4905E-06 | 6.2726E-05 | Def:WT      |
| S100a9 | 20202     | 6.02911858 | 3.4166E-10 | 3.0544E-08 | Def:WT      |
| Sele   | 20339     | 2.46560872 | 9.0476E-05 | 0.0006222  | Def:WT      |
| Sell   | 20343     | 2.36721255 | 8.2428E-05 | 0.00058484 | Def:WT      |
| Smad3  | 17127     | 0.28600294 | 0.00861511 | 0.02437312 | Def:WT      |
| Socs3  | 12702     | 1.22837364 | 0.00026994 | 0.00152741 | Def:WT      |
| Stat1  | 20846     | 0.87899754 | 6.3858E-05 | 0.00051899 | Def:WT      |
| Stat2  | 20847     | 1.23039835 | 9.838E-05  | 0.0006467  | Def:WT      |
| Stat3  | 20848     | 0.7213516  | 8.6241E-07 | 1.542E-05  | Def:WT      |
| Stat5a | 20850     | 0.56132111 | 0.00181245 | 0.00736516 | Def:WT      |
| Stat5b | 20851     | 0.45350613 | 0.02113319 | 0.04747004 | Def:WT      |
| Stat6  | 20852     | 0.4019469  | 0.00092076 | 0.00424311 | Def:WT      |

| Gene      | Entrez ID | logFC      | pvalue     | qvalue     | Comparison* |
|-----------|-----------|------------|------------|------------|-------------|
| Syk       | 20963     | 0.85443908 | 0.00345461 | 0.01187853 | Def:WT      |
| Tagap     | 72536     | 1.05732642 | 0.01956431 | 0.04461861 | Def:WT      |
| Tap1      | 21354     | 0.61954619 | 0.00056414 | 0.00289853 | Def:WT      |
| Tapbp     | 21356     | 0.4942555  | 0.00338005 | 0.01179488 | Def:WT      |
| Tbk1      | 56480     | 0.37132498 | 0.00837889 | 0.02392484 | Def:WT      |
| Tcf7      | 21414     | -0.7769312 | 0.00782532 | 0.02257356 | Def:WT      |
| Tgfb1     | 21803     | 0.55056093 | 0.00883522 | 0.02468339 | Def:WT      |
| Tgfb1     | 21810     | 0.92423954 | 0.00075132 | 0.00369053 | Def:WT      |
| Tgfb2     | 21813     | 0.71963592 | 0.00367852 | 0.01238366 | Def:WT      |
| Thy1      | 21838     | 0.515858   | 0.00098883 | 0.0043763  | Def:WT      |
| Tirap     | 117149    | 0.440983   | 0.00144998 | 0.00605738 | Def:WT      |
| Tlr1      | 21897     | 1.05679169 | 0.00082931 | 0.00394824 | Def:WT      |
| Tlr2      | 24088     | 1.05054955 | 0.00044102 | 0.00234684 | Def:WT      |
| Tlr3      | 142980    | 0.46222935 | 0.00921363 | 0.02542279 | Def:WT      |
| Tlr4      | 21898     | 0.90461966 | 0.0051927  | 0.01657956 | Def:WT      |
| Tlr5      | 53791     | 0.67047182 | 0.00600269 | 0.0183781  | Def:WT      |
| Tlr8      | 170744    | 0.98090176 | 0.01577186 | 0.03710537 | Def:WT      |
| Tlr9      | 81897     | 0.83962399 | 0.00167537 | 0.00687057 | Def:WT      |
| Sting1    | 72512     | 0.57733489 | 0.01383827 | 0.03380167 | Def:WT      |
| Tnf       | 21926     | 3.04849334 | 1.6941E-05 | 0.00016462 | Def:WT      |
| Tnfaip3   | 21929     | 0.69645709 | 7.8314E-05 | 0.00057387 | Def:WT      |
| Tnfrsf11a | 21934     | 0.94127559 | 0.000333   | 0.00183769 | Def:WT      |
| Tnfrsf14  | 230979    | 0.64009793 | 0.01358461 | 0.03336441 | Def:WT      |
| Tnfrsf1b  | 21938     | 0.8156123  | 0.01600547 | 0.03733635 | Def:WT      |
| Tnfrsf4   | 22163     | 0.56630022 | 0.0005953  | 0.00302387 | Def:WT      |
| Tnfsf14   | 50930     | 1.25105424 | 0.00340389 | 0.01179488 | Def:WT      |
| Trem1     | 58217     | 25.9973372 | 4.7768E-06 | 6.4704E-05 | Def:WT      |
| Tslp      | 53603     | 2.40179304 | 0.00011788 | 0.00073185 | Def:WT      |
| Vcam1     | 22329     | 0.81962002 | 0.0122699  | 0.03116276 | Def:WT      |
| Xbp1      | 22433     | 0.33997335 | 0.00552938 | 0.01752931 | Def:WT      |
| Zeb1      | 21417     | 0.5506855  | 0.01125763 | 0.02892046 | Def:WT      |
| Ccl2      | 20296     | 1.43767131 | 0.00262108 | 0.03905403 | Def:Eng     |
| Ccl7      | 20306     | 1.47106319 | 0.00137369 | 0.02669728 | Def:Eng     |
| Cd44      | 12505     | 0.52744274 | 0.00034548 | 0.01072949 | Def:Eng     |
| Cd82      | 12521     | -0.5443381 | 0.0003527  | 0.01072949 | Def:Eng     |
| Cxcl1     | 14825     | 5.59365619 | 0.00047244 | 0.01242227 | Def:Eng     |
| Cxcl3     | 330122    | 37.9207325 | 1.609E-06  | 0.00023974 | Def:Eng     |
| Cxcr2     | 12765     | 3.98209086 | 0.00243273 | 0.03749759 | Def:Eng     |
| Cybb      | 13058     | -1.0707071 | 0.00220247 | 0.03548621 | Def:Eng     |
| Defb14    | 244332    | 2.24437535 | 0.0005684  | 0.01411526 | Def:Eng     |
| Ebi3      | 50498     | -1.3229136 | 2.3196E-05 | 0.00129608 | Def:Eng     |
| Fcgr1a    | 14125     | -5.0662052 | 2.0642E-07 | 4.6135E-05 | Def:Eng     |

| Gene    | Entrez ID | logFC      | pvalue     | qvalue     | Comparison* |
|---------|-----------|------------|------------|------------|-------------|
| Hif1a   | 15251     | 0.60121988 | 0.00034343 | 0.01072949 | Def:Eng     |
| Il1b    | 16176     | 3.00759148 | 3.3444E-06 | 0.00037373 | Def:Eng     |
| Il1r1   | 16177     | 0.38546041 | 0.00186245 | 0.03330055 | Def:Eng     |
| Il1rl1  | 17082     | 2.12475742 | 3.8798E-05 | 0.00192697 | Def:Eng     |
| Il1rl2  | 107527    | 0.44377864 | 0.00068523 | 0.01531481 | Def:Eng     |
| Il1rn   | 16181     | 0.34779683 | 0.00036005 | 0.01072949 | Def:Eng     |
| Il33    | 77125     | 1.26924505 | 6.3377E-05 | 0.00283297 | Def:Eng     |
| Il4ra   | 16190     | 0.77197954 | 0.00093636 | 0.01993114 | Def:Eng     |
| Il6     | 16193     | 3.76090926 | 2.2249E-05 | 0.00129608 | Def:Eng     |
| Ltb4r2  | 57260     | 0.79877484 | 0.00222285 | 0.03548621 | Def:Eng     |
| Muc1    | 17829     | 2.75463454 | 0.00064569 | 0.01519062 | Def:Eng     |
| Pou2f2  | 18987     | -0.8066599 | 0.00040863 | 0.01141619 | Def:Eng     |
| Ppbp    | 57349     | 3.52534944 | 0.00135651 | 0.02669728 | Def:Eng     |
| Ptgs2   | 19225     | 2.9851408  | 4.8123E-06 | 0.00043022 | Def:Eng     |
| S100a8  | 20201     | 3.8652725  | 1.0062E-05 | 0.00074965 | Def:Eng     |
| S100a9  | 20202     | 4.7062734  | 1.8056E-07 | 4.6135E-05 | Def:Eng     |
| Sele    | 20339     | 2.43449668 | 0.00013296 | 0.00540305 | Def:Eng     |
| Tgfr1   | 21812     | -0.4098002 | 0.00185108 | 0.03330055 | Def:Eng     |
| Trem1   | 58217     | 4.76223741 | 0.00215921 | 0.03548621 | Def:Eng     |
| Ahr     | 11622     | 0.75430395 | 0.00134904 | 0.00469158 | Eng:WT      |
| App     | 11820     | 0.23703065 | 0.02482129 | 0.04803082 | Eng:WT      |
| Arhgdib | 11857     | 0.96346057 | 1.2918E-05 | 0.00013428 | Eng:WT      |
| B2m     | 12010     | 0.97422275 | 6.0437E-07 | 1.3508E-05 | Eng:WT      |
| Batf    | 53314     | 1.13809924 | 0.00014528 | 0.00083256 | Eng:WT      |
| Bcap31  | 27061     | 0.19787806 | 0.00227327 | 0.0069126  | Eng:WT      |
| Bcl6    | 12053     | 0.7123485  | 1.1887E-05 | 0.00012652 | Eng:WT      |
| Bid     | 12122     | 0.60202523 | 0.0002872  | 0.00138043 | Eng:WT      |
| Blnk    | 17060     | 0.83702215 | 0.00018749 | 0.00099773 | Eng:WT      |
| Bst1    | 12182     | 1.2608098  | 0.00053732 | 0.00226588 | Eng:WT      |
| Bst2    | 69550     | 1.22035553 | 3.8665E-09 | 3.4566E-07 | Eng:WT      |
| Btk     | 12229     | 1.06032712 | 0.00103541 | 0.00388932 | Eng:WT      |
| C1qa    | 12259     | 1.29929041 | 0.00011131 | 0.00065471 | Eng:WT      |
| C1qb    | 12260     | 1.40080189 | 5.7401E-05 | 0.00038296 | Eng:WT      |
| C1ra    | 50909     | 0.7952419  | 0.00161792 | 0.00529177 | Eng:WT      |
| C1s1    | 50908     | 0.95679634 | 0.00019755 | 0.0010268  | Eng:WT      |
| C2      | 12263     | 0.76632443 | 0.0062554  | 0.01487321 | Eng:WT      |
| Card9   | 332579    | 0.93121384 | 0.00015753 | 0.00086935 | Eng:WT      |
| Casp1   | 12362     | 0.60850419 | 3.6781E-07 | 8.6533E-06 | Eng:WT      |
| Casp8   | 12370     | 0.41824974 | 0.00071363 | 0.00284814 | Eng:WT      |
| Ackr2   | 59289     | 1.95268597 | 0.00034097 | 0.00158763 | Eng:WT      |
| Ccl12   | 20293     | 0.93787497 | 0.01898689 | 0.03829113 | Eng:WT      |
| Ccl20   | 20297     | 1.42037469 | 0.00700219 | 0.01646978 | Eng:WT      |

| Gene    | Entrez ID | logFC      | pvalue     | qvalue     | Comparison* |
|---------|-----------|------------|------------|------------|-------------|
| Ccl3    | 20302     | 2.00288794 | 0.00020853 | 0.0010714  | Eng:WT      |
| Ccl4    | 20303     | 2.87393567 | 0.00243621 | 0.00720167 | Eng:WT      |
| Ccl6    | 20305     | 1.21427825 | 0.01819468 | 0.03722258 | Eng:WT      |
| Ccr2    | 12772     | 1.08098323 | 0.00152464 | 0.00504826 | Eng:WT      |
| Ackr4   | 252837    | 0.75385576 | 0.00854289 | 0.01928621 | Eng:WT      |
| Ccr12   | 54199     | 2.32585551 | 5.8477E-06 | 7.0646E-05 | Eng:WT      |
| Cd109   | 235505    | 0.46912599 | 0.00258412 | 0.00731115 | Eng:WT      |
| Cd14    | 12475     | 1.50064156 | 6.0068E-05 | 0.00039486 | Eng:WT      |
| Cd22    | 12483     | 0.92564342 | 0.00488959 | 0.0122789  | Eng:WT      |
| Cd244a  | 18106     | 0.90080631 | 0.00850561 | 0.01928621 | Eng:WT      |
| Cd274   | 60533     | 1.03926031 | 0.00246572 | 0.00720378 | Eng:WT      |
| Cd36    | 12491     | 1.02615286 | 0.0034856  | 0.00932971 | Eng:WT      |
| Cd4     | 12504     | 0.81216212 | 0.01739972 | 0.03609024 | Eng:WT      |
| Cd40    | 21939     | 0.68367149 | 0.02329629 | 0.04565257 | Eng:WT      |
| Cd48    | 12506     | 1.07236617 | 0.00190481 | 0.0060296  | Eng:WT      |
| Cd53    | 12508     | 0.99236886 | 0.02134014 | 0.04239574 | Eng:WT      |
| Cd74    | 16149     | 1.32088967 | 0.00481794 | 0.01216735 | Eng:WT      |
| Cd79b   | 15985     | 1.77036294 | 0.00023698 | 0.00119023 | Eng:WT      |
| Cd80    | 12519     | 0.91978924 | 0.00025004 | 0.00122819 | Eng:WT      |
| Cd81    | 12520     | 0.36684126 | 0.00481129 | 0.01216735 | Eng:WT      |
| Cd83    | 12522     | 1.18306563 | 0.0080006  | 0.01824628 | Eng:WT      |
| Cd86    | 12524     | 1.2279971  | 8.7632E-07 | 1.6277E-05 | Eng:WT      |
| Adgre5  | 26364     | 0.77051964 | 0.00703742 | 0.01646978 | Eng:WT      |
| Ceacam1 | 26365     | 0.6372064  | 0.01852808 | 0.03764569 | Eng:WT      |
| Cfb     | 14962     | 0.98504354 | 1.1121E-05 | 0.00012427 | Eng:WT      |
| Cfd     | 11537     | 1.34300245 | 0.00771106 | 0.01767612 | Eng:WT      |
| Cfh     | 12628     | 1.03167478 | 0.00183541 | 0.00590238 | Eng:WT      |
| Cfp     | 18636     | 1.07396095 | 0.00407297 | 0.0106469  | Eng:WT      |
| Ciita   | 12265     | 1.02723603 | 0.01306236 | 0.02827778 | Eng:WT      |
| Clec4e  | 56619     | 2.07059273 | 0.02260677 | 0.04451642 | Eng:WT      |
| Clec5a  | 23845     | 1.10957359 | 0.00068869 | 0.00277338 | Eng:WT      |
| Cmklr1  | 14747     | 1.02875593 | 1.4987E-05 | 0.00015226 | Eng:WT      |
| Crlf2   | 57914     | 1.13277333 | 0.00041817 | 0.00185071 | Eng:WT      |
| Csf1    | 12977     | 0.96126471 | 3.2412E-06 | 4.2613E-05 | Eng:WT      |
| Csf1r   | 12978     | 1.18147382 | 0.00025528 | 0.00124034 | Eng:WT      |
| Csf2rb  | 12983     | 0.8987904  | 0.00622525 | 0.01487321 | Eng:WT      |
| Csf3r   | 12986     | 0.95566629 | 0.00128965 | 0.00461178 | Eng:WT      |
| Ctnnb1  | 12387     | -0.4937133 | 0.0011572  | 0.00423991 | Eng:WT      |
| Ctsc    | 13032     | 0.51082616 | 0.00036504 | 0.00166501 | Eng:WT      |
| Ctss    | 13040     | 1.53050252 | 0.00209181 | 0.00649332 | Eng:WT      |
| Cul9    | 78309     | 0.6433325  | 0.0056978  | 0.01376712 | Eng:WT      |
| Cx3cr1  | 13051     | 1.88446856 | 4.1068E-06 | 5.245E-05  | Eng:WT      |

| Gene    | Entrez ID | logFC      | pvalue     | qvalue     | Comparison* |
|---------|-----------|------------|------------|------------|-------------|
| Cxcl12  | 20315     | 0.65528387 | 3.5986E-05 | 0.00027712 | Eng:WT      |
| Cxcl13  | 55985     | 2.96611795 | 0.00044096 | 0.00193243 | Eng:WT      |
| Cxcl9   | 17329     | 1.79456854 | 0.00494573 | 0.01228189 | Eng:WT      |
| Cxcr2   | 12765     | 21.7188659 | 6.1062E-15 | 1.3647E-12 | Eng:WT      |
| Cxcr3   | 12766     | 0.86041    | 0.00654275 | 0.01547413 | Eng:WT      |
| Cxcr4   | 12767     | 0.74395624 | 0.00244889 | 0.00720167 | Eng:WT      |
| Cybb    | 13058     | 1.70493756 | 1.6116E-06 | 2.5728E-05 | Eng:WT      |
| Ddx58   | 230073    | 0.65890913 | 1.0484E-07 | 3.9052E-06 | Eng:WT      |
| Ebi3    | 50498     | 1.73784772 | 3.9003E-08 | 1.7435E-06 | Eng:WT      |
| Adgre1  | 13733     | 1.68809653 | 3.2416E-05 | 0.00026117 | Eng:WT      |
| Entpd1  | 12495     | 1.20906427 | 1.4642E-07 | 4.6749E-06 | Eng:WT      |
| Ets1    | 23871     | 0.39162781 | 0.00516658 | 0.01268935 | Eng:WT      |
| Fas     | 14102     | 0.66240816 | 0.00475044 | 0.01216735 | Eng:WT      |
| Fcamr   | 64435     | -0.9199033 | 0.0047944  | 0.01216735 | Eng:WT      |
| Fcer1g  | 14127     | 1.3212003  | 3.2463E-05 | 0.00026117 | Eng:WT      |
| Fcgr1   | 14129     | 1.72707969 | 2.5359E-08 | 1.2595E-06 | Eng:WT      |
| Fcgr2b  | 14130     | 1.22210907 | 0.00286752 | 0.00791224 | Eng:WT      |
| Fcgr3   | 14131     | 1.41340529 | 0.00053677 | 0.00226588 | Eng:WT      |
| Fcgr4   | 246256    | 1.82825872 | 0.00010921 | 0.00065091 | Eng:WT      |
| Fcgrt   | 14132     | 0.94860189 | 0.00162186 | 0.00529177 | Eng:WT      |
| Fkbp5   | 14229     | 1.11004084 | 0.00150906 | 0.00504826 | Eng:WT      |
| Gm10499 | 69717     | 0.85595691 | 5.4245E-05 | 0.00036738 | Eng:WT      |
| Gpr183  | 321019    | 1.0275173  | 0.00258426 | 0.00731115 | Eng:WT      |
| H2-Aa   | 14960     | 1.4669812  | 0.00137819 | 0.00470269 | Eng:WT      |
| H2-Ab1  | 14961     | 1.30272773 | 0.00295674 | 0.00805891 | Eng:WT      |
| H2-DMa  | 14998     | 1.41892721 | 0.00133821 | 0.00469158 | Eng:WT      |
| H2-DMb2 | 15000     | 1.34895752 | 0.01215528 | 0.02663436 | Eng:WT      |
| H2-Eb1  | 14969     | 1.25211547 | 0.00569521 | 0.01376712 | Eng:WT      |
| H2-K1   | 14972     | 0.76572993 | 7.0802E-07 | 1.4386E-05 | Eng:WT      |
| H2-Q10  | 15007     | 2.52891983 | 0.00188644 | 0.00602312 | Eng:WT      |
| Hcst    | 23900     | 1.39403329 | 0.01446411 | 0.03093521 | Eng:WT      |
| Hfe     | 15216     | 0.9101743  | 0.00612682 | 0.01472412 | Eng:WT      |
| Hlx     | 15284     | 0.60834606 | 0.01498651 | 0.03189986 | Eng:WT      |
| Icam1   | 15894     | 0.56409713 | 0.00144451 | 0.00489164 | Eng:WT      |
| Ifi204  | 15951     | 1.42494896 | 2.7192E-06 | 3.7984E-05 | Eng:WT      |
| Ifi35   | 70110     | 0.61262477 | 3.2719E-05 | 0.00026117 | Eng:WT      |
| Ifih1   | 71586     | 0.85666387 | 3.3766E-07 | 8.3851E-06 | Eng:WT      |
| Ifit2   | 15958     | 1.4897161  | 1.1104E-06 | 1.8383E-05 | Eng:WT      |
| Ifnar1  | 15975     | 0.48404448 | 8.8792E-07 | 1.6277E-05 | Eng:WT      |
| Ifnar2  | 15976     | 0.99893665 | 3.2324E-06 | 4.2613E-05 | Eng:WT      |
| Ifngr1  | 15979     | 1.1701267  | 2.9423E-05 | 0.00025292 | Eng:WT      |
| Ifngr2  | 15980     | 0.58047192 | 0.00010849 | 0.00065091 | Eng:WT      |

| Gene    | Entrez ID | logFC      | pvalue     | qvalue     | Comparison* |
|---------|-----------|------------|------------|------------|-------------|
| Ikbke   | 56489     | 0.93046701 | 9.585E-07  | 1.6479E-05 | Eng:WT      |
| Ikzf1   | 22778     | 1.06242789 | 0.0047901  | 0.01216735 | Eng:WT      |
| Ikzf2   | 22779     | 0.89958417 | 0.0024925  | 0.00723473 | Eng:WT      |
| Il10ra  | 16154     | 1.35952885 | 8.6266E-06 | 0.00010148 | Eng:WT      |
| Il10rb  | 16155     | 1.02790002 | 5.2204E-05 | 0.00036461 | Eng:WT      |
| Il13ra1 | 16164     | 0.62698914 | 0.001247   | 0.00449523 | Eng:WT      |
| Il15    | 16168     | 0.65940967 | 0.01578765 | 0.03344587 | Eng:WT      |
| Il15ra  | 16169     | 0.71853044 | 0.00280918 | 0.00779939 | Eng:WT      |
| Il16    | 16170     | 1.33463179 | 1.4225E-07 | 4.6749E-06 | Eng:WT      |
| Il17ra  | 16172     | 0.50952526 | 0.00062972 | 0.00260633 | Eng:WT      |
| Il18r1  | 16182     | 1.15951823 | 0.00033445 | 0.00157366 | Eng:WT      |
| Il1r2   | 16178     | 0.66071896 | 0.02129115 | 0.04239574 | Eng:WT      |
| Il22ra2 | 237310    | 2.09737618 | 0.00087191 | 0.00333115 | Eng:WT      |
| Il2rg   | 16186     | 0.83352257 | 0.00242767 | 0.00720167 | Eng:WT      |
| Il33    | 77125     | 1.01512779 | 0.00135395 | 0.00469158 | Eng:WT      |
| Il4ra   | 16190     | 0.54613532 | 0.01901707 | 0.03829113 | Eng:WT      |
| Il6ra   | 16194     | 1.12054153 | 4.9127E-05 | 0.00034857 | Eng:WT      |
| Il7r    | 16197     | 1.37017697 | 0.00533726 | 0.0130369  | Eng:WT      |
| Il9     | 16198     | -3.3368729 | 0.01353639 | 0.02909021 | Eng:WT      |
| Irak1   | 16179     | 0.30984556 | 0.01653577 | 0.03470183 | Eng:WT      |
| Irak2   | 108960    | 0.68782514 | 1.5206E-08 | 9.7102E-07 | Eng:WT      |
| Irak3   | 73914     | 1.07409303 | 3.0656E-07 | 8.0606E-06 | Eng:WT      |
| Irak4   | 266632    | 0.62398018 | 0.00037344 | 0.00166928 | Eng:WT      |
| Irf1    | 16362     | 0.82930717 | 3.3952E-05 | 0.00026625 | Eng:WT      |
| Irf5    | 27056     | 1.03239076 | 2.8027E-05 | 0.00025056 | Eng:WT      |
| Irf7    | 54123     | 1.28883841 | 0.00065351 | 0.00267998 | Eng:WT      |
| Irf8    | 15900     | 1.48074606 | 2.4808E-06 | 3.5772E-05 | Eng:WT      |
| Irgm1   | 15944     | 1.28907709 | 2.0624E-08 | 1.1524E-06 | Eng:WT      |
| Itga4   | 16401     | 1.2725377  | 2.7751E-07 | 7.753E-06  | Eng:WT      |
| Itgal   | 16408     | 0.94512192 | 0.00015226 | 0.00086154 | Eng:WT      |
| Itgam   | 16409     | 1.24827856 | 0.00232593 | 0.00702494 | Eng:WT      |
| Itgb1   | 16412     | 0.41471711 | 0.00151792 | 0.00504826 | Eng:WT      |
| Itgb2   | 16414     | 1.22332848 | 0.00317641 | 0.00860519 | Eng:WT      |
| Jak1    | 16451     | 0.69694869 | 4.6263E-06 | 5.7443E-05 | Eng:WT      |
| Jak2    | 16452     | 0.46538118 | 0.0011338  | 0.00418848 | Eng:WT      |
| Kit     | 16590     | -5.7186637 | 6.1062E-15 | 1.3647E-12 | Eng:WT      |
| Klrc1   | 16641     | 1.32485128 | 0.01076894 | 0.02394883 | Eng:WT      |
| Klrd1   | 16643     | 0.97436829 | 0.02226736 | 0.04404208 | Eng:WT      |
| Klrk1   | 27007     | 1.03460339 | 0.00712796 | 0.01659478 | Eng:WT      |
| Lair1   | 52855     | 1.51589578 | 0.00132997 | 0.00469158 | Eng:WT      |
| Lcp2    | 16822     | 1.42963036 | 0.00059577 | 0.00248887 | Eng:WT      |
| Pirb    | 18733     | 1.2587462  | 5.3937E-05 | 0.00036738 | Eng:WT      |



| Gene     | Entrez ID | logFC      | pvalue     | qvalue     | Comparison* |
|----------|-----------|------------|------------|------------|-------------|
| Lilrb4a  | 14728     | 1.48597448 | 8.7345E-05 | 0.00055663 | Eng:WT      |
| Litaf    | 56722     | 0.7497895  | 0.00010029 | 0.00062266 | Eng:WT      |
| Ltb      | 16994     | 1.00359888 | 0.0027642  | 0.00772248 | Eng:WT      |
| Ltbr     | 17000     | 0.21551707 | 0.02413681 | 0.04690936 | Eng:WT      |
| Ly86     | 17084     | 1.49372747 | 4.5455E-05 | 0.00033309 | Eng:WT      |
| Ly96     | 17087     | 0.87040401 | 9.1033E-07 | 1.6277E-05 | Eng:WT      |
| Map4k1   | 26411     | 1.19085122 | 0.01816964 | 0.03722258 | Eng:WT      |
| Mapk14   | 26416     | 0.33958452 | 0.00493417 | 0.01228189 | Eng:WT      |
| Mapkapk2 | 17164     | 0.41444371 | 1.5936E-05 | 0.0001583  | Eng:WT      |
| Mbp      | 17196     | 1.74488851 | 0.0008643  | 0.00333052 | Eng:WT      |
| Msr1     | 20288     | 1.40085145 | 0.001009   | 0.00382224 | Eng:WT      |
| Myd88    | 17874     | 0.58296464 | 0.00019412 | 0.00102082 | Eng:WT      |
| Ncf4     | 17972     | 1.14844744 | 0.0013647  | 0.00469248 | Eng:WT      |
| Nfatc1   | 18018     | 0.67888846 | 0.00022288 | 0.00113214 | Eng:WT      |
| Nfatc2   | 18019     | 0.91478239 | 1.9518E-06 | 2.9186E-05 | Eng:WT      |
| Nfkb1    | 18033     | 0.46244643 | 2.938E-05  | 0.00025292 | Eng:WT      |
| Nfkb2    | 18034     | 0.36167273 | 0.00925163 | 0.02067739 | Eng:WT      |
| Nfkbia   | 18035     | 0.7758751  | 6.3557E-05 | 0.00041174 | Eng:WT      |
| Nfkbiz   | 80859     | 0.77929209 | 1.6614E-05 | 0.00016145 | Eng:WT      |
| Nod2     | 257632    | 1.07080509 | 0.00276368 | 0.00772248 | Eng:WT      |
| Nos2     | 18126     | -0.8623067 | 0.023388   | 0.04565257 | Eng:WT      |
| Notch1   | 18128     | -0.5878474 | 0.01148845 | 0.02542245 | Eng:WT      |
| Nox4     | 50490     | 1.05601213 | 0.00331706 | 0.00893208 | Eng:WT      |
| Pdcd2    | 18567     | -0.2881732 | 0.01706521 | 0.03564555 | Eng:WT      |
| Pdgfb    | 18591     | 0.60536365 | 0.00191544 | 0.0060296  | Eng:WT      |
| Pla2g2e  | 26970     | -1.1309751 | 0.02078589 | 0.04166498 | Eng:WT      |
| Pml      | 18854     | 0.52192268 | 0.00035813 | 0.00165037 | Eng:WT      |
| Pou2f2   | 18987     | 1.52071474 | 7.3573E-11 | 8.2218E-09 | Eng:WT      |
| Pparg    | 19016     | 0.82341688 | 0.0005327  | 0.00226588 | Eng:WT      |
| Ppbp     | 57349     | 22.5123668 | 0.00401621 | 0.01056027 | Eng:WT      |
| Prdm1    | 12142     | -0.5899911 | 0.01309508 | 0.02827778 | Eng:WT      |
| Prkcd    | 18753     | 0.64610747 | 0.00072398 | 0.00286387 | Eng:WT      |
| Psmb10   | 19171     | 0.94917712 | 0.00016053 | 0.00087508 | Eng:WT      |
| Psmb5    | 19173     | -0.2581162 | 0.01277936 | 0.02786524 | Eng:WT      |
| Psmb9    | 16912     | 0.92884507 | 8.8413E-05 | 0.00055663 | Eng:WT      |
| Psmc7    | 17463     | -0.3299275 | 0.00215347 | 0.00659316 | Eng:WT      |
| Ptafr    | 19204     | 1.38848425 | 1.8555E-05 | 0.00017647 | Eng:WT      |
| Ptpn22   | 19260     | 1.44364995 | 0.00017695 | 0.00095299 | Eng:WT      |
| Ptpn6    | 15170     | 1.15948851 | 4.3878E-12 | 6.5379E-10 | Eng:WT      |
| Ptprc    | 19264     | 1.13290796 | 0.00047335 | 0.00205426 | Eng:WT      |
| Rela     | 19697     | 0.42550965 | 0.0002412  | 0.00119796 | Eng:WT      |
| Relb     | 19698     | 0.70936354 | 3.0038E-05 | 0.00025334 | Eng:WT      |

| Gene      | Entrez ID | logFC      | pvalue     | qvalue     | Comparison* |
|-----------|-----------|------------|------------|------------|-------------|
| Rorc      | 19885     | 0.79172026 | 0.00734812 | 0.01701871 | Eng:WT      |
| Ski       | 20481     | 0.35751956 | 0.01743958 | 0.03609024 | Eng:WT      |
| Slamf7    | 75345     | 1.63130228 | 9.3585E-06 | 0.00010726 | Eng:WT      |
| Smad5     | 17129     | -0.3324006 | 0.01630312 | 0.03437498 | Eng:WT      |
| Spn       | 20737     | 1.35890761 | 0.00066943 | 0.00272034 | Eng:WT      |
| Stat1     | 20846     | 0.96718896 | 1.1453E-05 | 0.00012487 | Eng:WT      |
| Stat2     | 20847     | 0.82717505 | 0.00919682 | 0.02065818 | Eng:WT      |
| Stat3     | 20848     | 0.41538031 | 0.00456291 | 0.01185825 | Eng:WT      |
| Stat5a    | 20850     | 0.42736267 | 0.01823657 | 0.03722258 | Eng:WT      |
| Stat5b    | 20851     | 0.61030802 | 0.00197919 | 0.00618671 | Eng:WT      |
| Stat6     | 20852     | 0.49474701 | 4.7808E-05 | 0.00034468 | Eng:WT      |
| Syk       | 20963     | 0.98319764 | 0.00079158 | 0.00310385 | Eng:WT      |
| Tagap     | 72536     | 2.1877319  | 1.9588E-06 | 2.9186E-05 | Eng:WT      |
| Tap1      | 21354     | 0.89872064 | 6.4836E-07 | 1.3801E-05 | Eng:WT      |
| Tapbp     | 21356     | 0.69851067 | 3.6577E-05 | 0.00027712 | Eng:WT      |
| Tbk1      | 56480     | 0.43550131 | 0.00214682 | 0.00659316 | Eng:WT      |
| Tcf7      | 21414     | -0.886617  | 0.0025646  | 0.00731115 | Eng:WT      |
| Tgfb1     | 21803     | 0.8053235  | 0.00013587 | 0.00078876 | Eng:WT      |
| Tgfb1     | 21810     | 0.97758756 | 0.00037077 | 0.00166928 | Eng:WT      |
| Tgfb1     | 21812     | 0.56033591 | 2.0837E-05 | 0.00019405 | Eng:WT      |
| Tgfb2     | 21813     | 0.75184592 | 0.00243069 | 0.00720167 | Eng:WT      |
| Tlr1      | 21897     | 1.31243876 | 3.7282E-05 | 0.00027775 | Eng:WT      |
| Tlr2      | 24088     | 1.6356949  | 6.6107E-08 | 2.6864E-06 | Eng:WT      |
| Tlr3      | 142980    | 0.47173881 | 0.01167659 | 0.02571152 | Eng:WT      |
| Tlr4      | 21898     | 0.97972481 | 0.00252705 | 0.00728769 | Eng:WT      |
| Tlr8      | 170744    | 1.33652875 | 0.00110021 | 0.00409828 | Eng:WT      |
| Tlr9      | 81897     | 1.55966813 | 8.4923E-09 | 6.3267E-07 | Eng:WT      |
| Tnfaip3   | 21929     | 0.74698313 | 2.5744E-05 | 0.00023484 | Eng:WT      |
| Tnfrsf11a | 21934     | 1.38033019 | 1.8494E-07 | 5.5111E-06 | Eng:WT      |
| Tnfrsf13b | 57916     | 0.77315539 | 0.00289449 | 0.00793765 | Eng:WT      |
| Tnfrsf14  | 230979    | 0.98682031 | 0.00015572 | 0.00086935 | Eng:WT      |
| Tnfrsf1b  | 21938     | 1.06918921 | 0.00167188 | 0.00541544 | Eng:WT      |
| Tnfsf12   | 21944     | 1.20061326 | 0.00010553 | 0.00064621 | Eng:WT      |
| Tollip    | 54473     | 0.27600459 | 0.0074007  | 0.01705213 | Eng:WT      |
| Trem2     | 83433     | 1.48315363 | 0.00377492 | 0.00998455 | Eng:WT      |
| Trp53     | 22059     | -0.5286375 | 0.00122164 | 0.0044396  | Eng:WT      |
| Tslp      | 53603     | 1.80240766 | 0.00505415 | 0.0124818  | Eng:WT      |
| Tyrobp    | 22177     | 1.31288337 | 0.00030339 | 0.00144271 | Eng:WT      |
| Vcam1     | 22329     | 1.10389234 | 0.00080549 | 0.00313089 | Eng:WT      |
| Zeb1      | 21417     | 0.6353865  | 0.00356883 | 0.00949565 | Eng:WT      |

\*Def = Deficient, Eng = Engrafted, OG = Other groups, WT = Wild-type

**Supplementary Table 4: Gene Set Enrichment Analysis**

| ID            | Description                                                               | NES  | pvalue   | qvalues  | Comparison* |
|---------------|---------------------------------------------------------------------------|------|----------|----------|-------------|
| mmu04657      | K_IL-17 signaling pathway                                                 | 1.72 | 9.93E-06 | 1.10E-03 | Def:OG      |
| mmu04060      | K_Cytokine-cytokine receptor interaction                                  | 1.46 | 4.72E-04 | 2.61E-02 | Def:OG      |
| mmu04061      | K_Viral protein interaction with cytokine and cytokine receptor           | 1.58 | 8.86E-04 | 2.61E-02 | Def:OG      |
| mmu04062      | K_Chemokine signaling pathway                                             | 1.59 | 9.46E-04 | 2.61E-02 | Def:OG      |
| mmu04668      | K_TNF signaling pathway                                                   | 1.60 | 1.46E-03 | 3.23E-02 | Def:OG      |
| GO:0071621    | G_granulocyte chemotaxis                                                  | 1.67 | 1.48E-05 | 1.12E-02 | Def:OG      |
| GO:0006935    | G_chemotaxis                                                              | 1.55 | 3.58E-05 | 1.12E-02 | Def:OG      |
| GO:0042330    | G_taxis                                                                   | 1.55 | 3.58E-05 | 1.12E-02 | Def:OG      |
| GO:0050900    | G_leukocyte migration                                                     | 1.52 | 4.59E-05 | 1.12E-02 | Def:OG      |
| R-MMU-6798695 | R_Neutrophil degranulation                                                | 1.59 | 7.74E-04 | 4.13E-02 | Def:OG      |
| R-MMU-162582  | R_Signal Transduction                                                     | 1.38 | 1.87E-03 | 4.13E-02 | Def:OG      |
| R-MMU-380108  | R_Chemokine receptors bind chemokines                                     | 1.67 | 2.23E-03 | 4.13E-02 | Def:OG      |
| R-MMU-373076  | R_Class A/1 (Rhodopsin-like receptors)                                    | 1.61 | 2.71E-03 | 4.13E-02 | Def:OG      |
| R-MMU-500792  | R_GPCR ligand binding                                                     | 1.60 | 2.85E-03 | 4.13E-02 | Def:OG      |
| R-MMU-372790  | R_Signaling by GPCR                                                       | 1.59 | 2.86E-03 | 4.13E-02 | Def:OG      |
| R-MMU-375276  | R_Peptide ligand-binding receptors                                        | 1.63 | 3.82E-03 | 4.32E-02 | Def:OG      |
| R-MMU-418594  | R_G alpha (i) signalling events                                           | 1.65 | 3.93E-03 | 4.32E-02 | Def:OG      |
| R-MMU-168249  | R_Innate Immune System                                                    | 1.38 | 4.28E-03 | 4.32E-02 | Def:OG      |
| MM3882        | H_COMPLEMENT                                                              | 1.61 | 2.51E-03 | 2.72E-02 | Def:OG      |
| MM3889        | H_EPITHELIAL_MESENCHYMAL_TRANSITION                                       | 1.68 | 3.04E-03 | 2.72E-02 | Def:OG      |
| mmu04657      | K_IL-17 signaling pathway                                                 | 1.88 | 1.64E-05 | 1.71E-03 | Def:WT      |
| mmu04062      | K_Chemokine signaling pathway                                             | 1.79 | 9.96E-05 | 3.46E-03 | Def:WT      |
| mmu04061      | K_Viral protein interaction with cytokine and cytokine receptor           | 1.73 | 6.97E-04 | 1.45E-02 | Def:WT      |
| mmu04060      | K_Cytokine-cytokine receptor interaction                                  | 1.56 | 9.30E-04 | 1.61E-02 | Def:WT      |
| mmu04668      | K_TNF signaling pathway                                                   | 1.68 | 3.03E-03 | 3.95E-02 | Def:WT      |
| GO:0071621    | G_granulocyte chemotaxis                                                  | 1.89 | 1.88E-06 | 2.85E-03 | Def:WT      |
| GO:1990266    | G_neutrophil migration                                                    | 1.87 | 3.84E-06 | 2.85E-03 | Def:WT      |
| GO:0006935    | G_chemotaxis                                                              | 1.72 | 4.30E-05 | 7.14E-03 | Def:WT      |
| GO:0042330    | G_taxis                                                                   | 1.72 | 4.30E-05 | 7.14E-03 | Def:WT      |
| GO:0007281    | G_germ cell development                                                   | 2.18 | 7.02E-05 | 1.01E-02 | Def:WT      |
| GO:0040011    | G_locomotion                                                              | 1.51 | 1.14E-04 | 1.50E-02 | Def:WT      |
| GO:0006928    | G_movement of cell or subcellular component                               | 1.51 | 1.24E-04 | 1.50E-02 | Def:WT      |
| GO:0009617    | G_response to bacterium                                                   | 1.59 | 1.69E-04 | 1.61E-02 | Def:WT      |
| GO:0051674    | G_localization of cell                                                    | 1.52 | 1.73E-04 | 1.61E-02 | Def:WT      |
| GO:0061844    | G_antimicrobial humoral immune response mediated by antimicrobial peptide | 1.90 | 2.08E-04 | 1.82E-02 | Def:WT      |
| GO:0006954    | G_inflammatory response                                                   | 1.49 | 2.30E-04 | 1.91E-02 | Def:WT      |
| GO:0055123    | G_digestive system development                                            | 2.04 | 3.10E-04 | 2.38E-02 | Def:WT      |
| GO:0019725    | G_cellular homeostasis                                                    | 1.70 | 3.42E-04 | 2.46E-02 | Def:WT      |

| ID            | Description                                                                                 | NES       | pvalue   | qvalues  | Comparison* |
|---------------|---------------------------------------------------------------------------------------------|-----------|----------|----------|-------------|
| GO:0070887    | G_cellular response to chemical stimulus                                                    | 1.35      | 5.17E-04 | 3.27E-02 | Def:WT      |
| GO:0006873    | G_cellular ion homeostasis                                                                  | 1.73      | 7.18E-04 | 4.10E-02 | Def:WT      |
| GO:0007204    | G_positive regulation of cytosolic calcium ion concentration                                | 1.76      | 7.19E-04 | 4.10E-02 | Def:WT      |
| GO:0048568    | G_embryonic organ development                                                               | -<br>1.88 | 7.26E-04 | 4.10E-02 | Def:WT      |
| GO:0009605    | G_response to external stimulus                                                             | 1.33      | 8.20E-04 | 4.35E-02 | Def:WT      |
| GO:0098771    | G_inorganic ion homeostasis                                                                 | 1.70      | 9.95E-04 | 4.35E-02 | Def:WT      |
| GO:0070098    | G_chemokine-mediated signaling pathway                                                      | 1.84      | 1.00E-03 | 4.35E-02 | Def:WT      |
| GO:1990868    | G_response to chemokine                                                                     | 1.84      | 1.00E-03 | 4.35E-02 | Def:WT      |
| GO:1990869    | G_cellular response to chemokine                                                            | 1.84      | 1.00E-03 | 4.35E-02 | Def:WT      |
| GO:0007548    | G_sex differentiation                                                                       | -<br>1.88 | 1.02E-03 | 4.35E-02 | Def:WT      |
| R-MMU-380108  | R_Chemokine receptors bind chemokines                                                       | 1.88      | 4.81E-05 | 4.81E-03 | Def:WT      |
| R-MMU-372790  | R_Signaling by GPCR                                                                         | 1.76      | 1.68E-04 | 6.65E-03 | Def:WT      |
| R-MMU-500792  | R_GPCR ligand binding                                                                       | 1.77      | 2.04E-04 | 6.65E-03 | Def:WT      |
| R-MMU-418594  | R_G alpha (i) signalling events                                                             | 1.85      | 2.66E-04 | 6.65E-03 | Def:WT      |
| R-MMU-373076  | R_Class A/1 (Rhodopsin-like receptors)                                                      | 1.80      | 3.63E-04 | 6.87E-03 | Def:WT      |
| R-MMU-375276  | R_Peptide ligand-binding receptors                                                          | 1.84      | 4.31E-04 | 6.87E-03 | Def:WT      |
| R-MMU-388396  | R_GPCR downstream signalling                                                                | 1.80      | 4.81E-04 | 6.87E-03 | Def:WT      |
| R-MMU-6798695 | R_Neutrophil degranulation                                                                  | 1.66      | 2.18E-03 | 2.72E-02 | Def:WT      |
| R-MMU-162582  | R_Signal Transduction                                                                       | 1.47      | 3.31E-03 | 3.68E-02 | Def:WT      |
| R-MMU-168249  | R_Innate Immune System                                                                      | 1.47      | 4.50E-03 | 4.50E-02 | Def:WT      |
| mmu04657      | K_IL-17 signaling pathway                                                                   | 2.17      | 1.35E-09 | 1.44E-07 | Def:Eng     |
| mmu04621      | K_NOD-like receptor signaling pathway                                                       | 2.05      | 8.56E-06 | 3.03E-04 | Def:Eng     |
| mmu04064      | K_NF-kappa B signaling pathway                                                              | 1.98      | 8.25E-05 | 2.19E-03 | Def:Eng     |
| mmu04668      | K_TNF signaling pathway                                                                     | 2.02      | 1.04E-04 | 2.21E-03 | Def:Eng     |
| mmu05417      | K_Lipid and atherosclerosis                                                                 | 1.91      | 4.88E-04 | 7.41E-03 | Def:Eng     |
| mmu04061      | K_Viral protein interaction with cytokine and cytokine receptor                             | 1.87      | 2.88E-03 | 3.40E-02 | Def:Eng     |
| mmu04145      | K_Phagosome                                                                                 | -<br>1.81 | 3.54E-03 | 3.57E-02 | Def:Eng     |
| mmu04062      | K_Chemokine signaling pathway                                                               | 1.89      | 3.70E-03 | 3.57E-02 | Def:Eng     |
| GO:0071621    | G_granulocyte chemotaxis                                                                    | 2.03      | 4.70E-06 | 4.15E-03 | Def:Eng     |
| GO:0097530    | G_granulocyte migration                                                                     | 1.99      | 7.46E-06 | 4.15E-03 | Def:Eng     |
| GO:0006928    | G_movement of cell or subcellular component                                                 | 1.69      | 1.21E-05 | 4.15E-03 | Def:Eng     |
| GO:0040011    | G_locomotion                                                                                | 1.69      | 1.29E-05 | 4.15E-03 | Def:Eng     |
| GO:0051674    | G_localization of cell                                                                      | 1.69      | 2.54E-05 | 4.54E-03 | Def:Eng     |
| GO:0006935    | G_chemotaxis                                                                                | 1.82      | 3.68E-04 | 3.95E-02 | Def:Eng     |
| GO:0042330    | G_taxis                                                                                     | 1.82      | 3.68E-04 | 3.95E-02 | Def:Eng     |
| GO:0009617    | G_response to bacterium                                                                     | 1.71      | 4.31E-04 | 4.34E-02 | Def:Eng     |
| GO:0006954    | G_inflammatory response                                                                     | 1.60      | 4.97E-04 | 4.65E-02 | Def:Eng     |
| GO:0002495    | G_antigen processing and presentation of peptide antigen via MHC class II                   | -<br>1.92 | 5.49E-04 | 4.65E-02 | Def:Eng     |
| GO:0002504    | G_antigen processing and presentation of peptide or polysaccharide antigen via MHC class II | -<br>1.92 | 5.49E-04 | 4.65E-02 | Def:Eng     |

| ID           | Description                                  | NES  | pvalue   | qvalues  | Comparison* |
|--------------|----------------------------------------------|------|----------|----------|-------------|
| MM3882       | H_COMPLEMENT                                 | 2.00 | 1.62E-04 | 2.90E-03 | Def:Eng     |
| MM3889       | H_EPITHELIAL_MESENCHYMAL_TRANSITION          | 1.93 | 9.50E-04 | 8.50E-03 | Def:Eng     |
| MM3860       | H_TNFA_SIGNALING_VIA_NFKB                    | 1.88 | 2.68E-03 | 1.60E-02 | Def:Eng     |
| mmu04062     | K_Chemokine signaling pathway                | 1.91 | 3.44E-04 | 1.90E-02 | Eng:WT      |
| GO:0055123   | G_digestive system development               | 2.27 | 1.33E-05 | 2.07E-02 | Eng:WT      |
| GO:0097530   | G_granulocyte migration                      | 1.89 | 1.05E-04 | 3.10E-02 | Eng:WT      |
| GO:0043207   | G_response to external biotic stimulus       | 1.52 | 1.13E-04 | 3.10E-02 | Eng:WT      |
| GO:0051707   | G_response to other organism                 | 1.52 | 1.13E-04 | 3.10E-02 | Eng:WT      |
| GO:0006955   | G_immune response                            | 1.49 | 1.19E-04 | 3.10E-02 | Eng:WT      |
| GO:0044419   | G_interspecies interaction between organisms | 1.45 | 2.44E-04 | 4.63E-02 | Eng:WT      |
| GO:0009607   | G_response to biotic stimulus                | 1.50 | 2.67E-04 | 4.63E-02 | Eng:WT      |
| R-MMU-380108 | R_Chemokine receptors bind chemokines        | 2.09 | 2.77E-05 | 2.72E-03 | Eng:WT      |
| R-MMU-375276 | R_Peptide ligand-binding receptors           | 2.02 | 1.22E-04 | 4.64E-03 | Eng:WT      |
| R-MMU-372790 | R_Signaling by GPCR                          | 1.92 | 1.42E-04 | 4.64E-03 | Eng:WT      |
| R-MMU-500792 | R_GPCR ligand binding                        | 1.95 | 2.07E-04 | 4.83E-03 | Eng:WT      |
| R-MMU-373076 | R_Class A/1 (Rhodopsin-like receptors)       | 1.99 | 2.79E-04 | 4.83E-03 | Eng:WT      |
| R-MMU-418594 | R_G alpha (i) signalling events              | 2.00 | 2.96E-04 | 4.83E-03 | Eng:WT      |
| R-MMU-388396 | R_GPCR downstream signalling                 | 1.95 | 5.01E-04 | 7.00E-03 | Eng:WT      |
| R-MMU-168249 | R_Innate Immune System                       | 1.57 | 7.59E-04 | 9.28E-03 | Eng:WT      |

\*Def = Deficient, Eng = Engrafted, OG = Other groups, WT = Wild-type

## Supplementary References

1. Rao, N., *et al.* Engineering an Injectable Muscle-Specific Microenvironment for Improved Cell Delivery Using a Nanofibrous Extracellular Matrix Hydrogel. *ACS Nano* **11**, 3851-3859 (2017).
2. Wang, H., *et al.* NanoStringDiff: a novel statistical method for differential expression analysis based on NanoString nCounter data. *Nucleic Acids Research* **44**, e151-e151 (2016).
3. R., K. pheatmap: Pretty heatmaps [Software]. (2015).
